# Supplementary material for: The genomic landscape of Mexican Indigenous populations brings insights into the peopling of the Americas
Source: PubMed Central journal article supplement (PMC8511047; doi:10.1038/s41467-021-26188-w), 2021-10-12
Supplement: 41467_2021_26188_MOESM1_ESM.pdf [file 41467_2021_26188_MOESM1_ESM.pdf]

# The genomic landscape of Mexican Indigenous populations brings insights into the peopling of the Americas

Humberto García-Ortiz<sup>1\*‡</sup>, Francisco Barajas-Olmos<sup>1‡</sup>, Cecilia Contreras-Cubas<sup>1‡</sup>, Miguel Ángel Cid-Soto<sup>1</sup>, Emilio J. Córdova<sup>1</sup>, Federico Centeno-Cruz<sup>1</sup>, Elvia Mendoza-Caamal<sup>1</sup>, Isabel Cicerón-Arellano<sup>1</sup>, Marlen Flores-Huacuja<sup>1</sup>, Paulina Baca<sup>1</sup>, Deborah A. Bolnick<sup>2</sup>, Meradeth Snow<sup>3</sup>, Silvia Esperanza Flores-Martínez<sup>4</sup>, Rocío Ortíz-López<sup>5</sup>, Austin W. Reynolds<sup>6</sup>, Antonio Blanchet<sup>1</sup>, Mirna Morales-Marín<sup>1</sup>, Rafael Velázquez-Cruz<sup>1</sup>, Aleksandar David Kostic<sup>7</sup>, Carlos Galaviz-Hernández<sup>8</sup>, Alejandra Guadalupe García-Zapién<sup>9</sup>, José Concepción Jiménez-López<sup>10†</sup>, Guadalupe León-Reyes<sup>1</sup>, Eva Gabriela Salas-Bautista<sup>10</sup>, Blanca Patricia Lazalde-Ramos<sup>11</sup>, Juan Luis Jiménez-Ruíz<sup>1</sup>, Guadalupe Salas-Martínez<sup>1</sup>, Jazmín Ramos-Madrigal<sup>12</sup>, Elaheh Mirzaeicheshmeh<sup>1</sup>, Yolanda Saldaña-Alvarez<sup>1</sup>, María del Carmen Abrahantes-Pérez<sup>1</sup>, Francisco Loeza-Becerra<sup>13</sup>, Raúl Mojica-Espinosa<sup>1</sup>, Federico Sánchez-Quinto<sup>1</sup>, Héctor Rangel-Villalobos<sup>14</sup>, Martha Sosa-Macías<sup>8</sup>, José Sánchez-Corona<sup>4†</sup>, Augusto Rojas-Martínez<sup>5</sup>, Angélica Martínez-Hernández<sup>1</sup>, Lorena Orozco<sup>1\*</sup>.

\*Correspondence to: [lorozco@inmegen.gob.mx](mailto:lorozco@inmegen.gob.mx); [hgarcia@inmegen.gob.mx](mailto:hgarcia@inmegen.gob.mx).

‡These authors contributed equal to this work.

## This PDF file includes:

Supplementary Tables 1 to 5.  
Supplementary Figs. 1 to 18.

Supplementary table 1. Mexican Indigenous populations Included in the present study.

| Ethnic Group       | N  | N after QC | Linguistic Family† | Main Geographic/Cultural Area | Latitude | Longitude | Source     | Genotyping platform              |
|--------------------|----|------------|--------------------|-------------------------------|----------|-----------|------------|----------------------------------|
| Cucapa             | 7  | 7          |                    |                               | 32.27    | -114.46   | This Study | Affymetrix 6.0                   |
| Kiliwa             | 1  | 1          |                    |                               | 32.11    | -116.41   | This Study | Affymetrix 6.0                   |
| Kuahl              | 1  | 1          |                    |                               | 31.52    | -116.36   | This Study | Affymetrix 6.0                   |
| Kumiai             | 3  | 3          |                    |                               | 31.52    | -116.35   | This Study | Affymetrix 6.0                   |
| Paipai             | 2  | 2          |                    |                               | 32.11    | -116.41   | This Study | Affymetrix 6.0                   |
| Seri               | 10 | 10         |                    |                               | 29.01    | -112.11   | This Study | Affymetrix 6.0                   |
| Seri (2)*          | 24 | 16         |                    |                               | 29.00    | -112.15   | 2          | Affymetrix 6.0                   |
| Papago             | 8  | 8          |                    |                               | 30.43    | -111.50   | This Study | Affymetrix 6.0                   |
| Pima (8)*          | 33 | 32         |                    |                               | 29.30    | -108.80   | 8          | Illumina 650 Y array             |
| Pima               | 1  | 1          |                    |                               | 28.22    | -108.55   | This Study | Affymetrix 6.0                   |
| Yaqui (8)*         | 1  | 1          |                    |                               | 28.00    | -113.00   | 8          | Illumina 610-Quad array          |
| Tarahumara (2)*    | 24 | 22         |                    |                               | 27.75    | -107.17   | 2          | Affymetrix 6.0                   |
| Yaqui              | 10 | 10         |                    |                               | 27.55    | -110.54   | This Study | Affymetrix 6.0                   |
| Tarahumara         | 56 | 52         |                    |                               | 27.22    | -108.17   | This Study | Affymetrix 6.0                   |
| Mayo               | 10 | 10         |                    |                               | 27.04    | -109.29   | This Study | Affymetrix 6.0                   |
| Guarijio           | 10 | 10         |                    |                               | 27.01    | -108.56   | This Study | Affymetrix 6.0                   |
| Huichol            | 11 | 11         |                    |                               | 23.28    | -104.23   | This Study | Affymetrix 6.0                   |
| Mexicanero         | 10 | 10         |                    |                               | 23.28    | -104.23   | This Study | Affymetrix 6.0                   |
| Tepehuano          | 12 | 12         |                    |                               | 23.20    | -104.50   | This Study | Affymetrix 6.0                   |
| Tepehuano (9)*     | 20 | 14         |                    |                               | 23.20    | -104.50   | 9          | Affymetrix 500K                  |
| Cora               | 11 | 11         |                    |                               | 22.07    | -105.12   | This Study | Affymetrix 6.0                   |
| Huichol (2)*       | 24 | 22         |                    |                               | 21.17    | -104.08   | 2          | Affymetrix 6.0                   |
| Nahuatl_CDMX       | 16 | 16         |                    |                               | 19.26    | -99.08    | This Study | Affymetrix 6.0/Illumina OMNI 2.5 |
| Nahuatl_Gro        | 1  | 1          |                    |                               | 17.43    | -98.56    | This Study | Affymetrix 6.0                   |
| Nahuatl_Jal (2)*   | 20 | 20         |                    |                               | 19.50    | -103.50   | 2          | Affymetrix 6.0                   |
| Nahuatl_Mex        | 27 | 27         |                    |                               | 19.30    | -99.43    | This Study | Affymetrix 6.0/Illumina OMNI 2.5 |
| Nahuatl_Mor        | 10 | 10         |                    |                               | 18.51    | -99.19    | This Study | Affymetrix 6.0                   |
| Nahuatl_Pue        | 10 | 10         |                    |                               | 19.49    | -97.39    | This Study | Affymetrix 6.0                   |
| Nahuatl_Pue (2)*   | 41 | 17         |                    |                               | 19.93    | -97.62    | 2          | Affymetrix 6.0                   |
| Nahuatl_SLP        | 12 | 10         |                    |                               | 21.25    | -98.44    | This Study | Affymetrix 6.0/Illumina OMNI 2.5 |
| Nahuatl_Trios (2)* | 23 | 21         |                    |                               | 19.97    | -97.62    | 2          | Affymetrix 6.0                   |
| Nahuatl_Ver        | 4  | 3          |                    |                               | 18.13    | -94.52    | This Study | Affymetrix 6.0                   |
| Purepecha          | 16 | 16         |                    |                               | 19.15    | -102.22   | This Study | Affymetrix 6.0/Illumina OMNI 2.5 |
| Purepecha (2)*     | 23 | 21         |                    |                               | 19.75    | -101.50   | 2          | Affymetrix 6.0                   |
| Purepecha (8)*     | 1  | 1          |                    |                               | 19.00    | -101.50   | 8          | Illumina 610-Quad array          |
| Tepehua            | 1  | 1          |                    |                               | 20.37    | -98.12    | This Study | Affymetrix 6.0                   |
| Totonaco (2)*      | 24 | 21         |                    |                               | 20.00    | -97.80    | 2          | Affymetrix 6.0                   |
| Totonaco_Pue       | 11 | 11         |                    |                               | 20.43    | -97.51    | This Study | Affymetrix 6.0                   |
| Totonaco_Ver       | 10 | 10         |                    |                               | 20.15    | -97.39    | This Study | Affymetrix 6.0                   |
| Amuzgo             | 2  | 2          |                    |                               | 16.41    | -98.24    | This Study | Affymetrix 6.0                   |
| Chatino            | 2  | 2          |                    |                               | 16.13    | -97.16    | This Study | Affymetrix 6.0                   |
| Chichimeca         | 1  | 1          |                    |                               | 21.17    | -100.31   | This Study | Affymetrix 6.0                   |
| Chinanteco         | 10 | 10         |                    |                               | 18.04    | -96.23    | This Study | Affymetrix 6.0                   |
| Chocholeco         | 6  | 6          |                    |                               | 16.57    | -96.28    | This Study | Affymetrix 6.0                   |
| Cuicateco          | 3  | 3          |                    |                               | 17.20    | -97.53    | This Study | Affymetrix 6.0                   |
| Ixcateco           | 1  | 1          |                    |                               | 17.51    | -97.11    | This Study | Affymetrix 6.0                   |
| Matlaltzinca       | 10 | 10         |                    |                               | 19.10    | -99.54    | This Study | Affymetrix 6.0                   |
| Mazahua            | 23 | 17         |                    |                               | 19.17    | -99.38    | This Study | Affymetrix 6.0/Illumina OMNI 2.5 |
| Mazateco (2)*      | 17 | 15         |                    |                               | 18.33    | -96.33    | 2          | Affymetrix 6.0                   |
| Mazateco_Oax       | 14 | 12         |                    |                               | 18.22    | -96.44    | This Study | Affymetrix 6.0                   |
| Mazateco_Pue       | 10 | 10         |                    |                               | 18.16    | -96.59    | This Study | Affymetrix 6.0                   |
| Mixteco (8)*       | 5  | 5          |                    |                               | 17.00    | -97.00    | 8          | Illumina 610-Quad array          |
| Mixteco_alto       | 12 | 12         |                    |                               | 17.32    | -97.43    | This Study | Affymetrix 6.0                   |
| Mixteco_costa      | 10 | 10         |                    |                               | 16.08    | -97.22    | This Study | Affymetrix 6.0                   |
| Otomi_Hgo          | 50 | 47         |                    |                               | 20.29    | -99.13    | This Study | Affymetrix 6.0                   |
| Otomi_Mex          | 15 | 15         |                    |                               | 19.28    | -99.32    | This Study | Affymetrix 6.0/Illumina OMNI 2.5 |
| Otomi_Oro          | 2  | 2          |                    |                               | 20.11    | -100.08   | This Study | Affymetrix 6.0                   |
| Pame               | 10 | 10         |                    |                               | 22.55    | -100.55   | This Study | Affymetrix 6.0                   |
| Popoloca           | 2  | 2          |                    |                               | 18.35    | -97.55    | This Study | Affymetrix 6.0                   |
| Tlahuica           | 10 | 10         |                    |                               | 19.00    | -99.23    | This Study | Affymetrix 6.0                   |
| Tlapaneco          | 2  | 2          |                    |                               | 16.58    | -98.40    | This Study | Affymetrix 6.0                   |
| Triqui             | 3  | 3          |                    |                               | 17.17    | -96.53    | This Study | Affymetrix 6.0                   |
| Triqui (2)*        | 24 | 22         |                    |                               | 17.28    | -97.95    | 2          | Affymetrix 6.0                   |
| Zapoteco           | 14 | 13         |                    |                               | 16.57    | -96.28    | This Study | Affymetrix 6.0                   |
| Zapoteco_N (9)*    | 21 | 21         |                    |                               | 17.41    | -96.69    | 9          | Affymetrix 500K                  |
| Zapoteco_S (2)*    | 24 | 18         |                    |                               | 17.23    | -96.23    | 2          | Affymetrix 6.0                   |
| Chontal_Oax        | 11 | 11         |                    |                               | 16.03    | -95.67    | This Study | Affymetrix 6.0/Illumina OMNI 2.5 |
| Huave              | 10 | 10         |                    |                               | 16.34    | -94.52    | This Study | Affymetrix 6.0                   |
| Mixe               | 10 | 10         |                    |                               | 16.57    | -95.05    | This Study | Affymetrix 6.0                   |
| Mixe (8)*          | 17 | 17         |                    |                               | 17.00    | -96.00    | 8          | Illumina 610-Quad array          |
| Popoloca_Sierra    | 10 | 10         |                    |                               | 18.14    | -94.52    | This Study | Affymetrix 6.0                   |
| Zoque              | 20 | 20         |                    |                               | 17.11    | -93.03    | This Study | Affymetrix 6.0                   |
| Awakateco          | 1  | 1          |                    |                               | 19.30    | -90.30    | This Study | Affymetrix 6.0                   |
| Chol               | 10 | 10         |                    |                               | 17.18    | -92.26    | This Study | Affymetrix 6.0                   |
| Chontal_Tab        | 2  | 2          |                    |                               | 18.10    | -93.01    | This Study | Affymetrix 6.0                   |
| Chuj               | 10 | 10         |                    |                               | 15.23    | -92.11    | This Study | Affymetrix 6.0                   |
| Huasteco           | 10 | 10         |                    |                               | 21.37    | -99.01    | This Study | Affymetrix 6.0                   |
| Ixil               | 1  | 1          |                    |                               | 19.29    | -89.59    | This Study | Affymetrix 6.0                   |
| Poptiacalteco      | 10 | 10         |                    |                               | 16.30    | -92.25    | This Study | Affymetrix 6.0                   |
| Kanjobal           | 10 | 10         |                    |                               | 15.23    | -92.13    | This Study | Affymetrix 6.0                   |
| Kaqchikel          | 10 | 10         |                    |                               | 15.23    | -92.11    | This Study | Affymetrix 6.0                   |
| Kekchi             | 2  | 2          |                    |                               | 19.20    | -90.43    | This Study | Affymetrix 6.0                   |
| Lacandon           | 11 | 11         |                    |                               | 16.54    | -92.05    | This Study | Affymetrix 6.0                   |
| Lacandon (2)*      | 22 | 8          |                    |                               | 16.75    | -91.25    | 2          | Affymetrix 6.0                   |
| Mam                | 12 | 12         |                    |                               | 15.30    | -92.13    | This Study | Affymetrix 6.0                   |
| Maya_Camp          | 2  | 2          |                    |                               | 19.60    | -90.40    | This Study | Affymetrix 6.0/Illumina OMNI 2.5 |
| Maya_Camp (9)*     | 45 | 27         |                    |                               | 20.37    | -90.05    | 9          | Affymetrix 500K                  |
| Maya_QR (2)*       | 18 | 15         |                    |                               | 19.58    | -88.58    | 2          | Affymetrix 6.0                   |
| Maya_Yuc           | 20 | 20         |                    |                               | 21.08    | -88.06    | This Study | Affymetrix 6.0                   |
| Mocho              | 10 | 10         |                    |                               | 15.22    | -92.14    | This Study | Affymetrix 6.0                   |
| Tojolabal          | 10 | 10         |                    |                               | 15.24    | -92.12    | This Study | Affymetrix 6.0                   |
| Tojolabal (2)*     | 21 | 15         |                    |                               | 16.50    | -92.00    | 2          | Affymetrix 6.0                   |
| Tzeltal            | 15 | 14         |                    |                               | 16.54    | -92.05    | This Study | Affymetrix 6.0                   |
| Tzotzil            | 16 | 16         |                    |                               | 17.04    | -92.51    | This Study | Affymetrix 6.0                   |
| Tzotzil (2)*       | 21 | 18         |                    |                               | 16.83    | -92.67    | 2          | Affymetrix 6.0                   |

\* Number between brackets represent the study source.

† Linguistic Classification was done based on INALI classification.

Supplementary table 2. Populations included in demographic reconstructions.

| <b>Population</b> | <b>Sample Size</b> | <b>Study Source</b>               |
|-------------------|--------------------|-----------------------------------|
| Seri              | 26                 | This Study/Moreno-Estrada, et al. |
| Mayo              | 10                 | This Study                        |
| Yaqui             | 10                 | This Study                        |
| Guarijio          | 10                 | This Study                        |
| Tarahumara        | 74                 | This Study/Moreno-Estrada, et al. |
| Huichol           | 35                 | This Study/Moreno-Estrada, et al. |
| Cora              | 11                 | This Study                        |
| Mexicanero        | 10                 | This Study                        |
| Tepehuano         | 12                 | This Study                        |
| Nahuatl_Jal       | 20                 | Moreno-Estrada, et al.            |
| Purepecha         | 37                 | This Study                        |
| Pame              | 10                 | This Study                        |
| Otomi_Hgo         | 47                 | This Study                        |
| Nahuatl_Mor       | 10                 | This Study                        |
| Matlaltzinca      | 10                 | This Study                        |
| Mazahua           | 17                 | This Study                        |
| Tlahuica          | 10                 | This Study                        |
| Huasteco          | 10                 | This Study                        |
| Totonaco_Ver      | 10                 | This Study                        |
| Totonaco_Pue      | 11                 | This Study                        |
| Totonaco          | 21                 | Moreno-Estrada, et al.            |
| Nahuatl_Pue       | 27                 | This Study/Moreno-Estrada, et al. |
| Chinanteco        | 10                 | This Study                        |
| Mixteco_alto      | 12                 | This Study                        |
| Mixteco_costa     | 10                 | This Study                        |
| Mazateco_Pue      | 10                 | This Study                        |
| Mazateco          | 15                 | Moreno-Estrada, et al.            |
| Mazateco_Oax      | 12                 | This Study                        |
| Triqui            | 24                 | This Study/Moreno-Estrada, et al. |
| Zapoteco          | 25                 | This Study/Moreno-Estrada, et al. |
| Mixe              | 10                 | This Study                        |
| Chontal_Oax       | 10                 | This Study                        |
| Huave             | 10                 | This Study                        |
| Popoluca_Sierra   | 10                 | This Study                        |
| Chol              | 10                 | This Study                        |
| Zoque             | 20                 | This Study                        |
| Maya_Yuc          | 20                 | This Study                        |
| Maya_QR           | 15                 | Moreno-Estrada, et al.            |
| Tzeltal           | 14                 | This Study                        |
| Poptijacalteco    | 10                 | This Study                        |
| Kaqchiquel        | 10                 | This Study                        |
| Mame              | 12                 | This Study                        |
| Mocho             | 10                 | This Study                        |
| Tzotzil           | 34                 | This Study/Moreno-Estrada, et al. |
| Chuj              | 10                 | This Study                        |
| Kanjobal          | 10                 | This Study                        |
| Tojolabal         | 25                 | This Study/Moreno-Estrada, et al. |
| Lacandon          | 19                 | This Study/Moreno-Estrada, et al. |

Supplementary table 3. Long-term effective population size by population.

| <b>Population*</b> | <b>Ne</b> | <b>CI</b>   |
|--------------------|-----------|-------------|
| Seri               | 984       | 909 - 1092  |
| Mayo               | 2508      | 1527 - 3328 |
| Yaqui              | 2335      | 1193 - 4193 |
| Guarijio           | 1832      | 1528 - 2138 |
| Tarahumara         | 2444      | 2222 - 2660 |
| Huichol            | 2043      | 1933 - 2189 |
| Cora               | 2162      | 1833 - 2721 |
| Mexicanero         | 1825      | 1548 - 2140 |
| Tepehuano          | 2448      | 2062 - 2835 |
| Nahuatl_Jal(2)     | 2829      | 2589 - 3440 |
| Purepecha          | 3331      | 3032 - 3694 |
| Pame               | 2542      | 2187 - 2850 |
| Otomi_Hgo          | 2917      | 2747 - 3239 |
| Nahuatl_Mor        | 2193      | 1817 - 2396 |
| Matlaltzinca       | 2433      | 2135 - 2689 |
| Mazahua            | 2711      | 2473 - 3014 |
| Tlahuica           | 1993      | 1679 - 3220 |
| Huasteco           | 2594      | 2384 - 2939 |
| Totonaco_Ver       | 3002      | 2617 - 3425 |
| Totonaco_Pue       | 2523      | 2283 - 3066 |
| Totonaco(2)        | 2418      | 2227 - 2825 |
| Nahuatl_Pue        | 3212      | 2897 - 3933 |
| Chinanteco         | 2598      | 2197 - 2977 |
| Mixteco_alto       | 2797      | 2390 - 3714 |
| Mixteco_costa      | 2507      | 2225 - 2673 |
| Mazateco_Pue       | 2642      | 2255 - 2899 |
| Mazateco(2)        | 2669      | 2422 - 2947 |
| Mazateco_Oax       | 2160      | 1856 - 2678 |
| Triqui             | 2032      | 1870 - 2369 |
| Zapoteco           | 2805      | 2563 - 3064 |
| Mixe               | 2527      | 2256 - 3198 |
| Chontal_Oax        | 2722      | 1614 - 3584 |
| Huave              | 2062      | 1550 - 2938 |
| Popoluca_Sierra    | 2199      | 1930 - 2608 |
| Chol               | 2621      | 2111 - 3026 |
| Zoque              | 2635      | 2465 - 2818 |
| Maya_Yuc           | 3291      | 3069 - 3685 |
| Maya_QR(2)         | 3079      | 2842 - 3428 |
| Tzeltal            | 2678      | 2337 - 2880 |
| Jakalteko          | 2094      | 1336 - 3105 |
| Kaqchiquel         | 2599      | 2239 - 2849 |
| Mame               | 2577      | 2229 - 2924 |
| Mocho              | 2371      | 2027 - 2862 |
| Tzotzil            | 2749      | 2519 - 2966 |
| Chuj               | 2353      | 2120 - 2550 |
| Kanjobal           | 2290      | 2072 - 2662 |
| Tojolabal          | 2330      | 2077 - 2617 |
| Lacandon           | 1593      | 1372 - 1752 |

\* Number between brackets represent the study source.

Supplementary table 4. Mexican Native american from MAIS cohort have at least 0.99 indigenous ancestry.

| Population      | N  | Study source |
|-----------------|----|--------------|
| Awakateco       | 1  | This Study   |
| Chinanteco      | 7  |              |
| Chocholteco     | 1  |              |
| Chol            | 6  |              |
| Chontal_Oax     | 1  |              |
| Chuj            | 10 |              |
| Cora            | 3  |              |
| Cucapa          | 2  |              |
| Cuicateco       | 1  |              |
| Guarijio        | 10 |              |
| Huasteco        | 9  |              |
| Huave           | 1  |              |
| Huichol         | 10 |              |
| Ixil            | 1  |              |
| Jakalteco       | 2  |              |
| Kanjobal        | 10 |              |
| Kaqchiquel      | 2  |              |
| Kekchi          | 2  |              |
| Lacandon        | 7  |              |
| Mame            | 6  |              |
| Matlaltzinca    | 7  |              |
| Maya_Camp       | 1  |              |
| Maya_Yuc        | 11 |              |
| Mazahua         | 5  |              |
| Mazateco_Oax    | 5  |              |
| Mazateco_Pue    | 9  |              |
| Mexicanero      | 10 |              |
| Mixe            | 6  |              |
| Mixteco_alto    | 11 |              |
| Mixteco_costa   | 10 |              |
| Mocho           | 4  |              |
| Nahuatl_Mor     | 10 |              |
| Nahuatl_Pue     | 3  |              |
| Nahuatl_SLP     | 7  |              |
| Nahuatl_Ver     | 2  |              |
| Otomi_Hgo       | 22 |              |
| Pame            | 4  |              |
| Pima            | 1  |              |
| Popoloca        | 2  |              |
| Popoluca_Sierra | 6  |              |
| Seri            | 10 |              |
| Tarahumara      | 29 |              |
| Tepehuano       | 4  |              |
| Tlapaneco       | 2  |              |
| Tojolabal       | 4  |              |
| Totonaco_Pue    | 11 |              |
| Totonaco_Ver    | 5  |              |
| Triqui          | 3  |              |
| Tzeltal         | 10 |              |
| Tzotzil         | 13 |              |
| Zapoteco        | 6  |              |

Supplementary table 5. Ancient and Modern genomes used for Treemix and D-statistics simulations.

| Population         | N | Study source                    |
|--------------------|---|---------------------------------|
| USR1               | 1 | Moreno-Mayar, J. V. et al. 2018 |
| Anzick-1           | 1 | Rasmussen, M. et al. 2018       |
| Saqqaq             | 1 | Rasmussen, M. et al. 2010       |
| Lucier             | 4 | Scheib, C. L. et al. 2018       |
| Alaskan Athabaskan | 1 |                                 |
| Aleut              | 2 | Mallick, S. et al, 2016         |
| Cree               | 2 |                                 |
| Chipewyan          | 2 |                                 |
| Karitiana          | 2 |                                 |
| Quechua            | 3 |                                 |
| Aymara             | 1 | Raghavan, M. et al. 2015        |

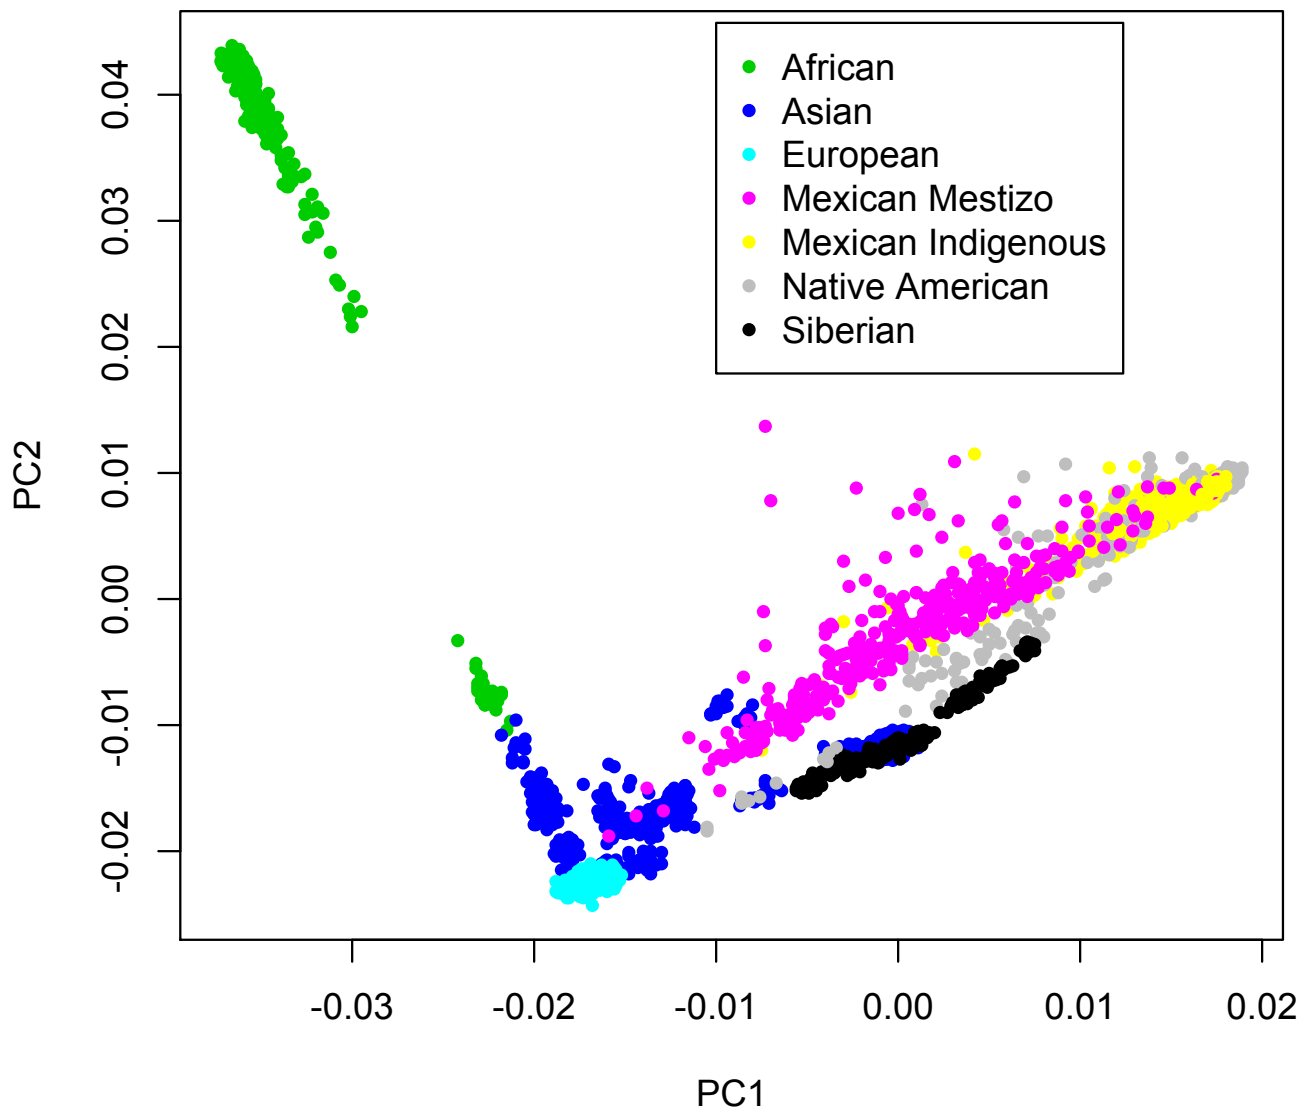

**Supplementary Figure 1. Principal component analysis performed in worldwide populations.** Projection of top two principal components shows that Mexican Indigenous populations can be grouped with other Native populations from the Americas.

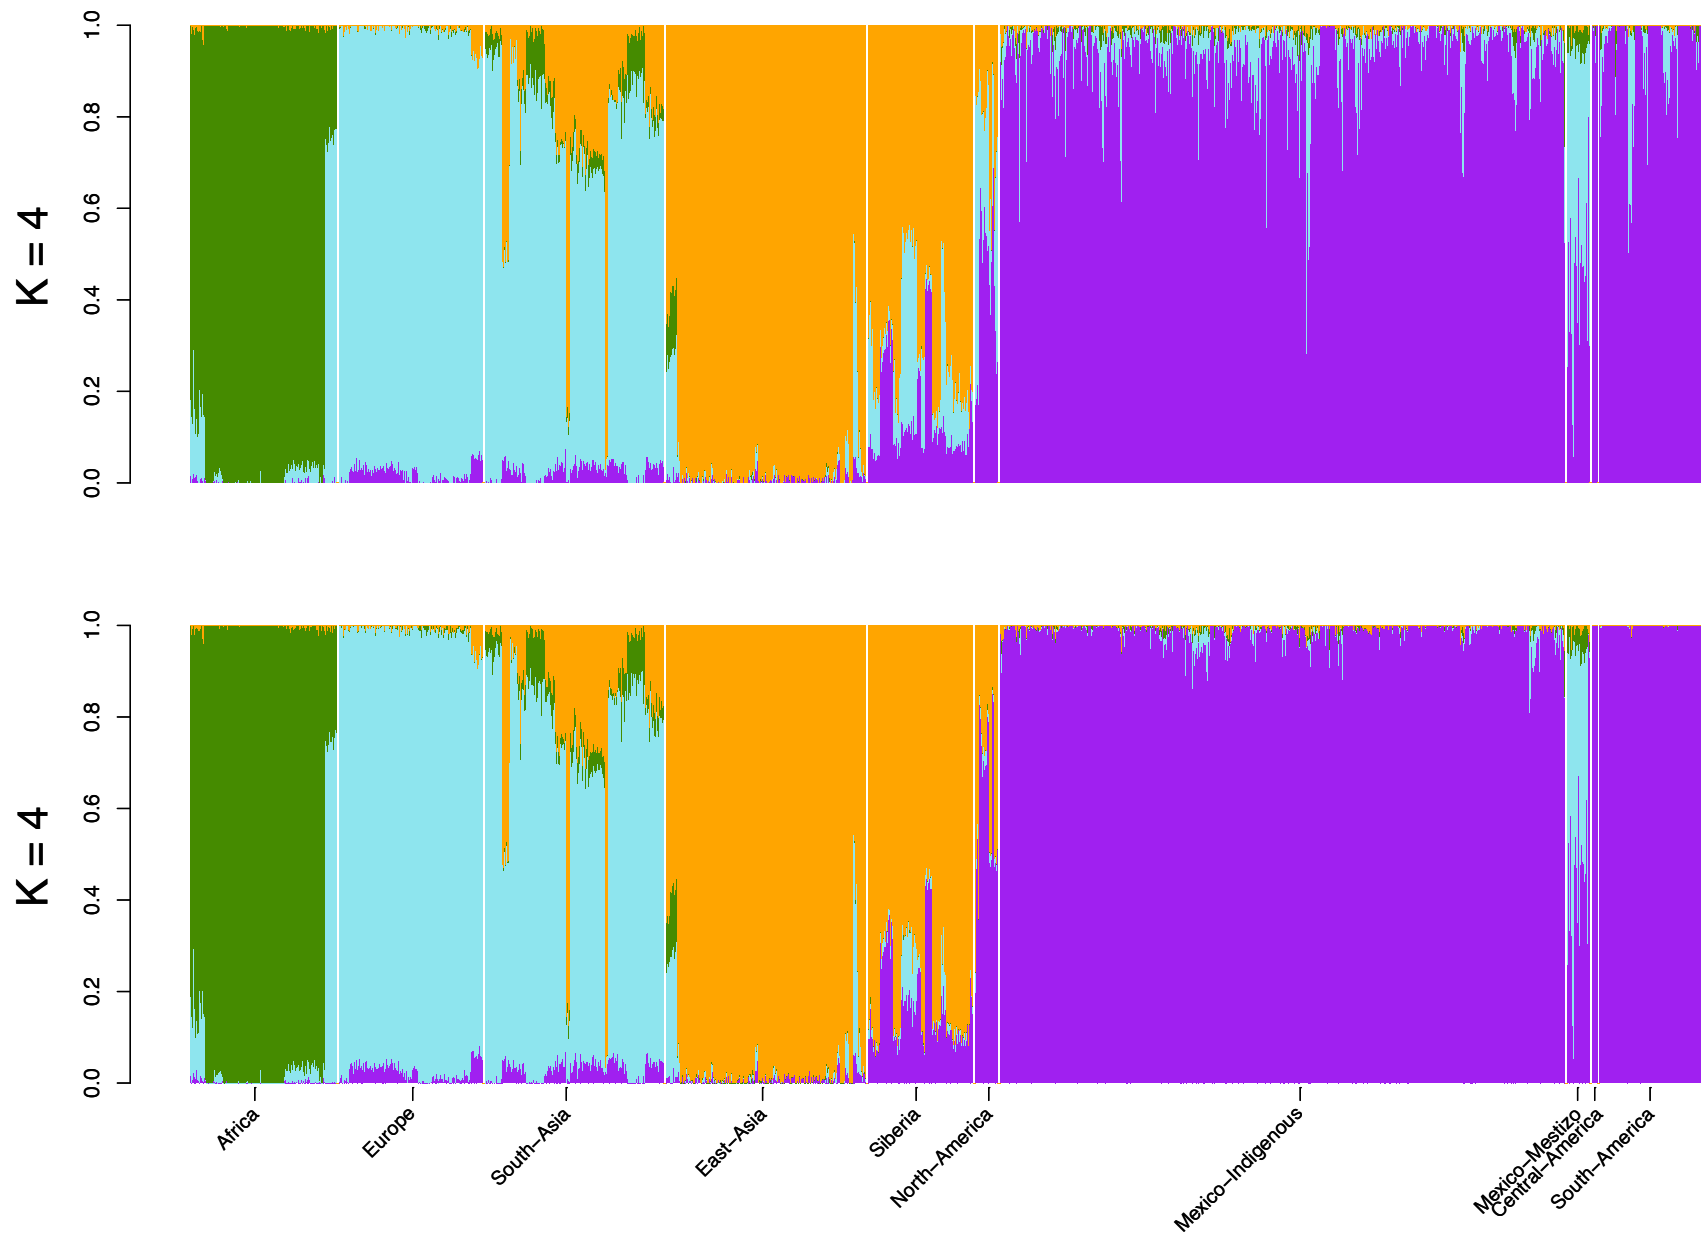

**Supplementary Figure 2. Admixture inference assuming  $K = 4$  clusters.** The inference of ancestry proportions in raw data set (upper panel) and ancestry masked data set (down panel) show the effectiveness of the local ancestry estimation to mask no Native American ancestry tracks. Purple colored bars represent the proportion of assumed Native American ancestry in each sample.



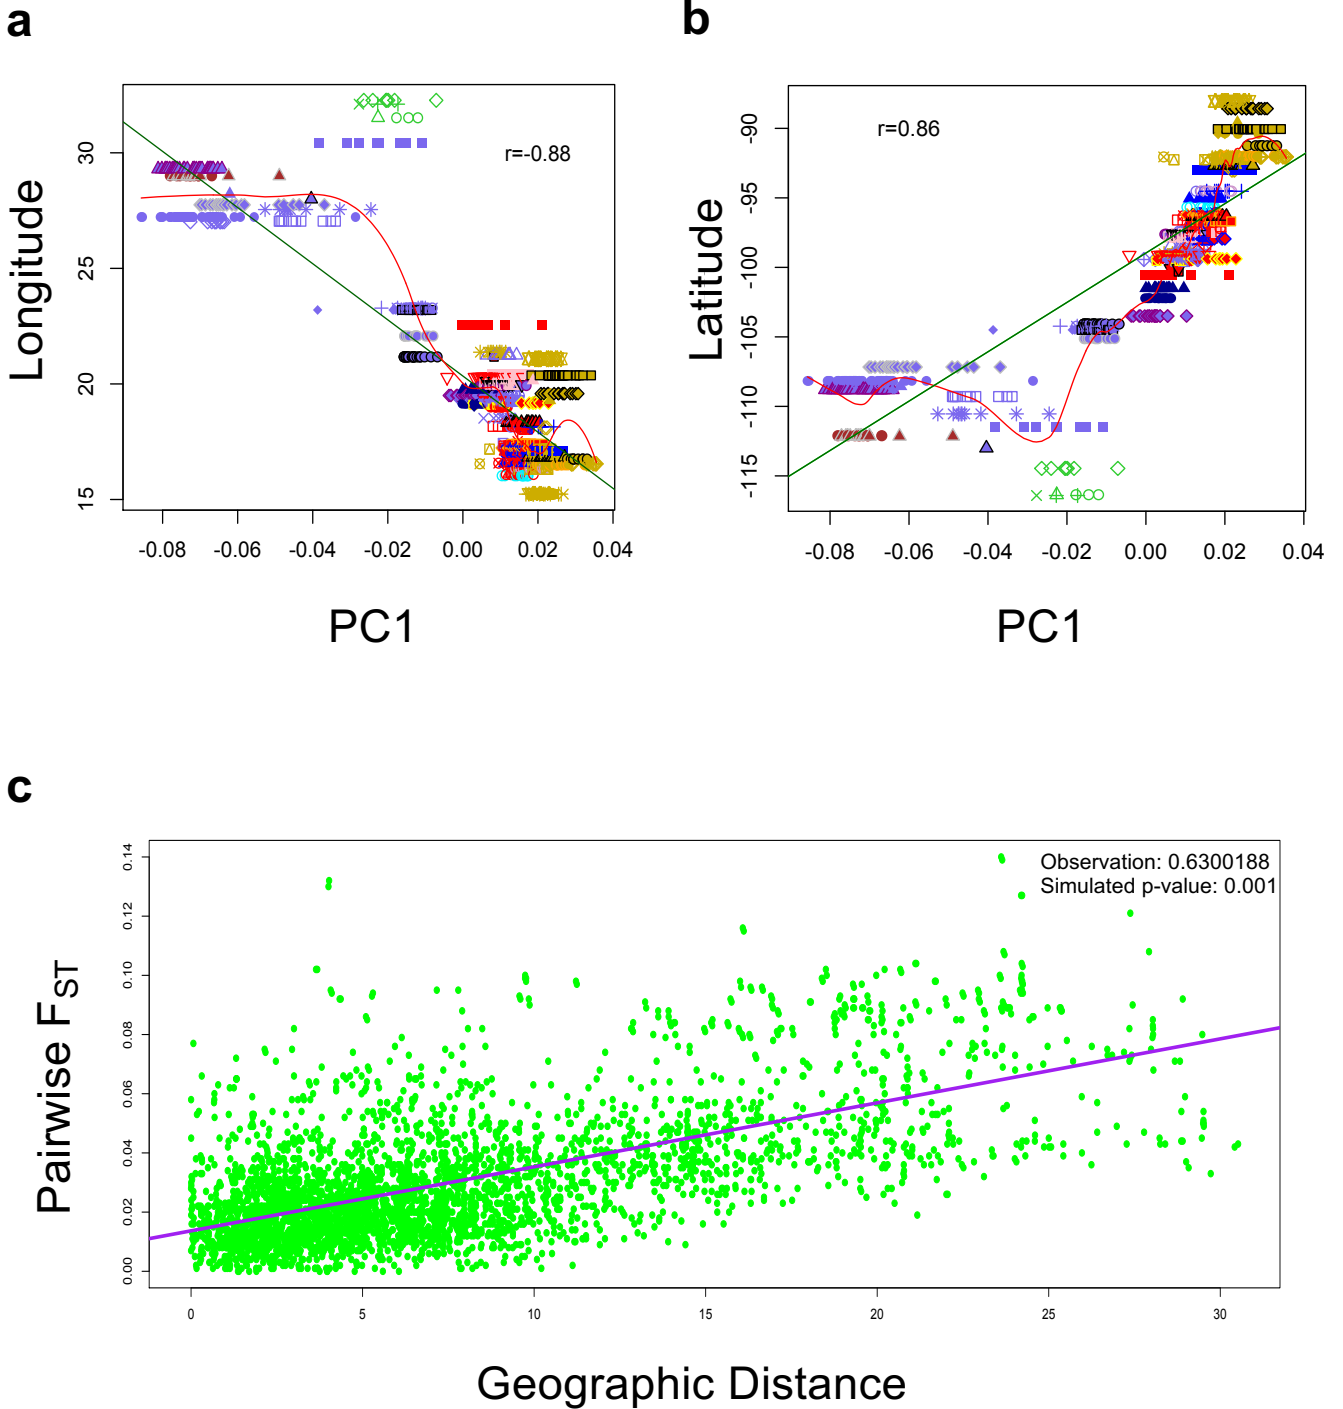

**Supplementary Figure 3. Genetic diversity of Mexican Indigenous populations is influenced by geographic location.** Correlation between PC1 and (a) latitude and (b) longitude (c) Correlation between genetic ( $F_{ST}$ ) and geographic distances estimated by Mantel test. The p-value remains significant after 999 replicates.



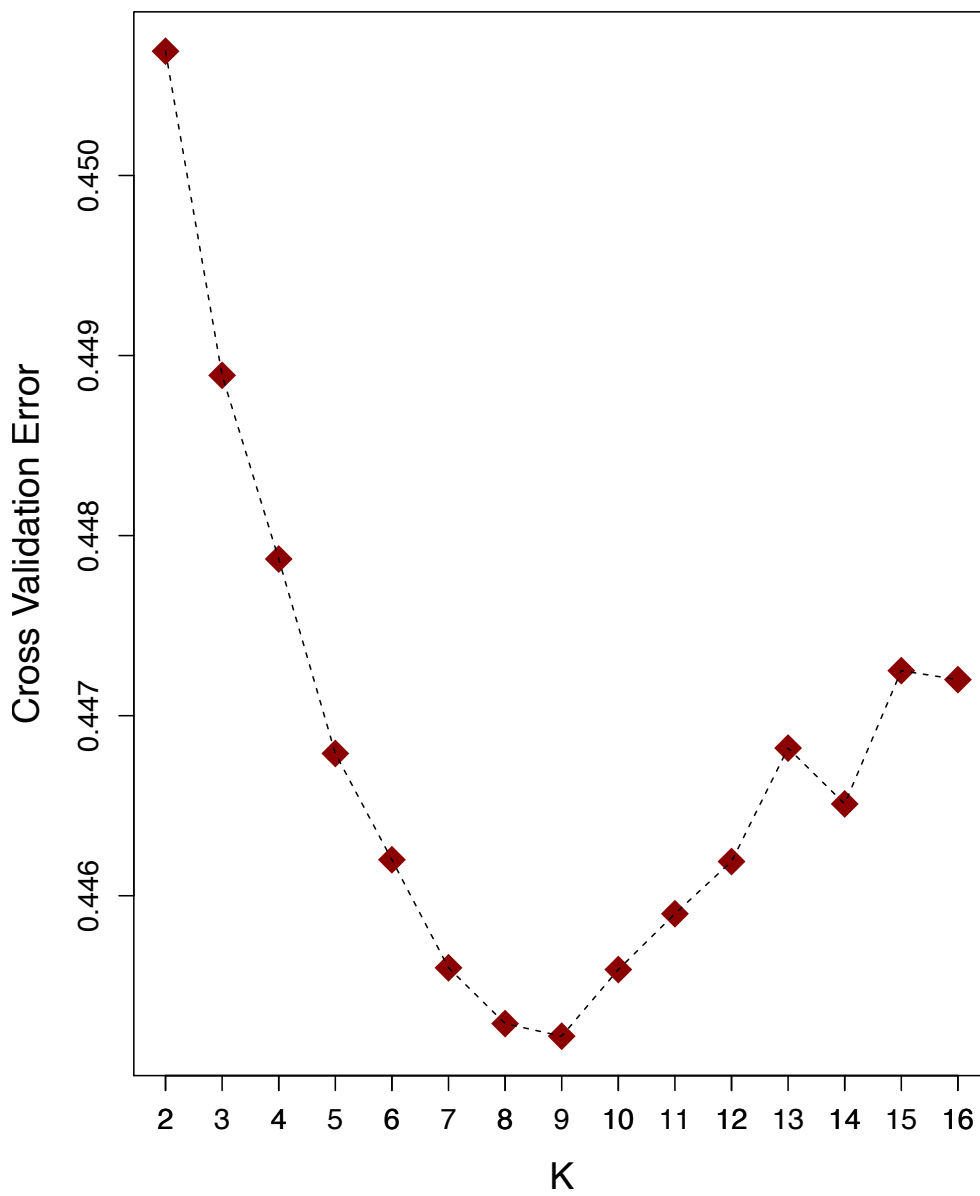

**Supplementary Figure 5. cross-validation error for admixture analyses K = 2-16 clusters.** Between each inferred cluster, the K = 9 had the lowest cross-validation error.

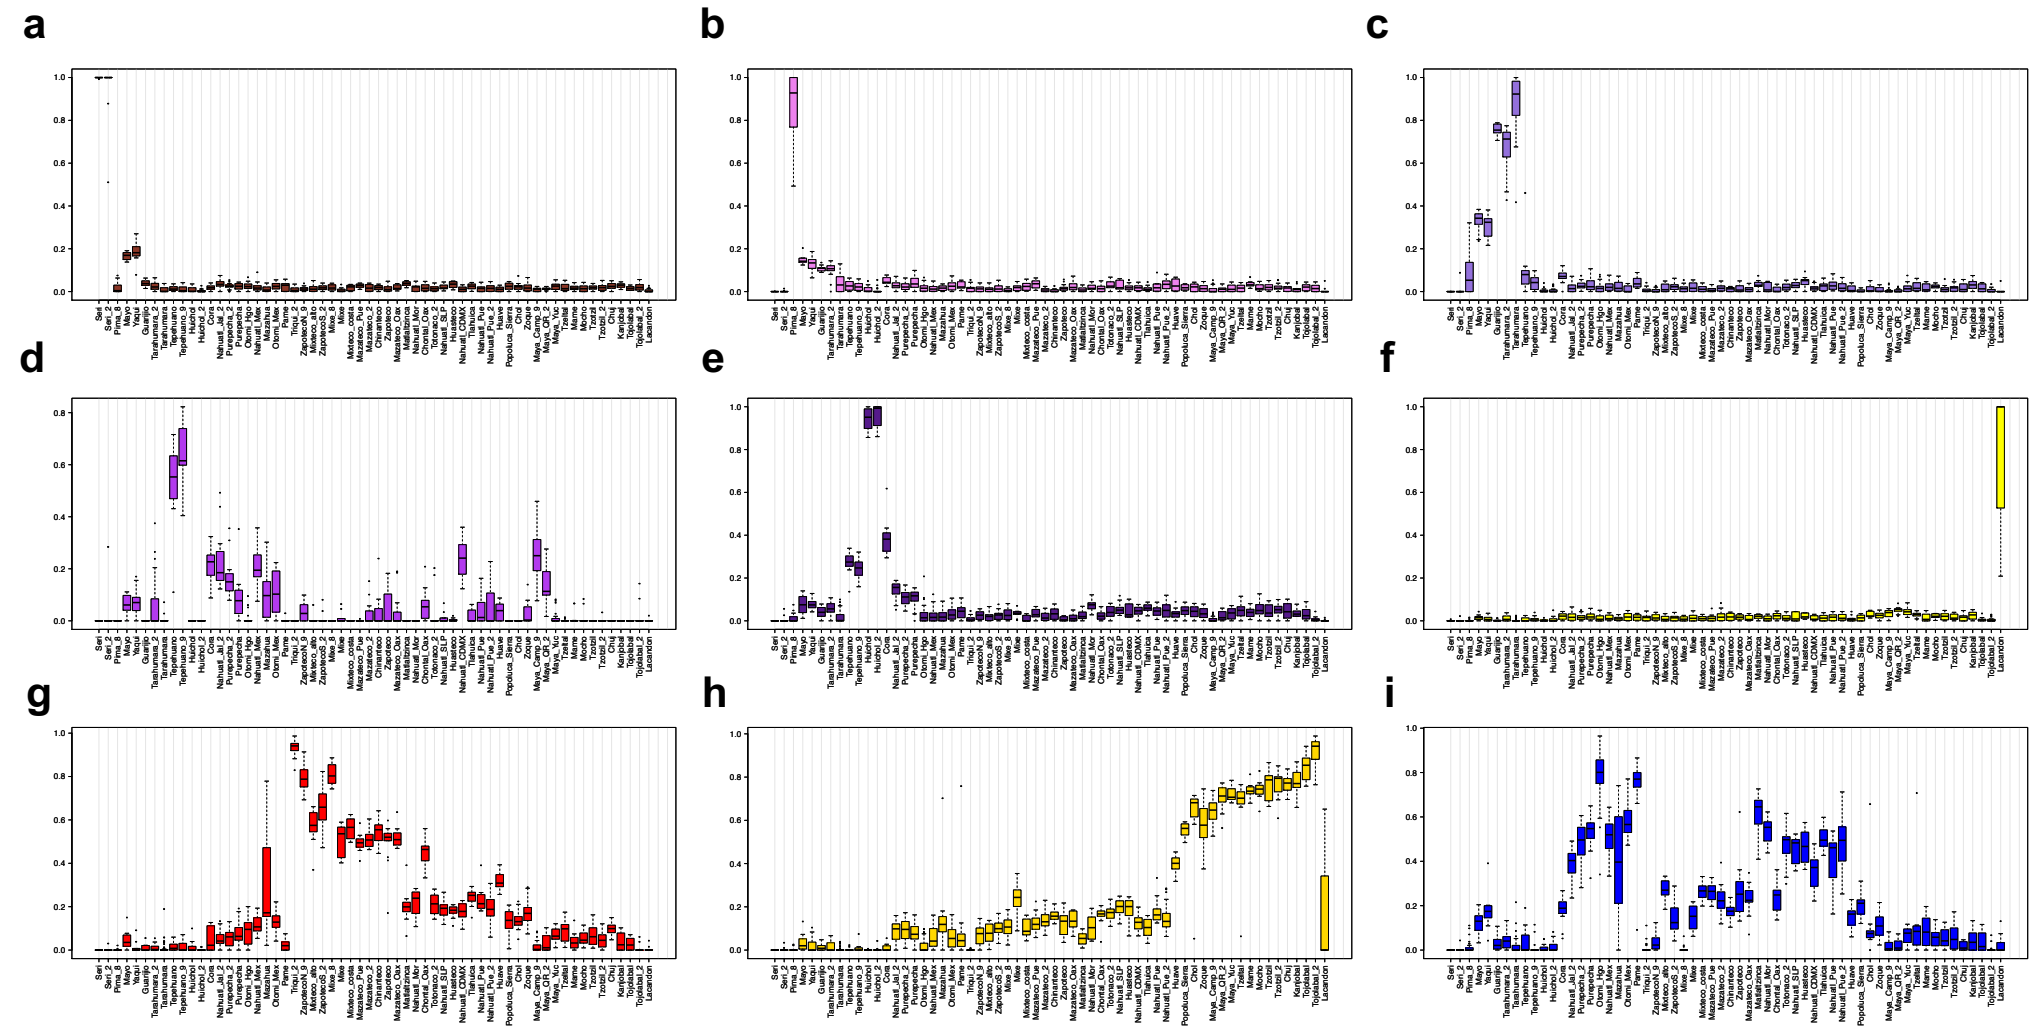

**Supplementary Figure 6. Boxplots of each ancestral component identified by admixture (K=9) in each ethnic group.** The graphs show the enrichment of some components in different ethnic groups ( a to f ) and regions ( g to i ). We are only showing the populations with a  $n \geq 10$  ( see supplementary table 1 ). In each boxplot the middle line is the median, the lower and upper hinges correspond to the first and third quartiles and whiskers the non-outlier range, while points are outliers.

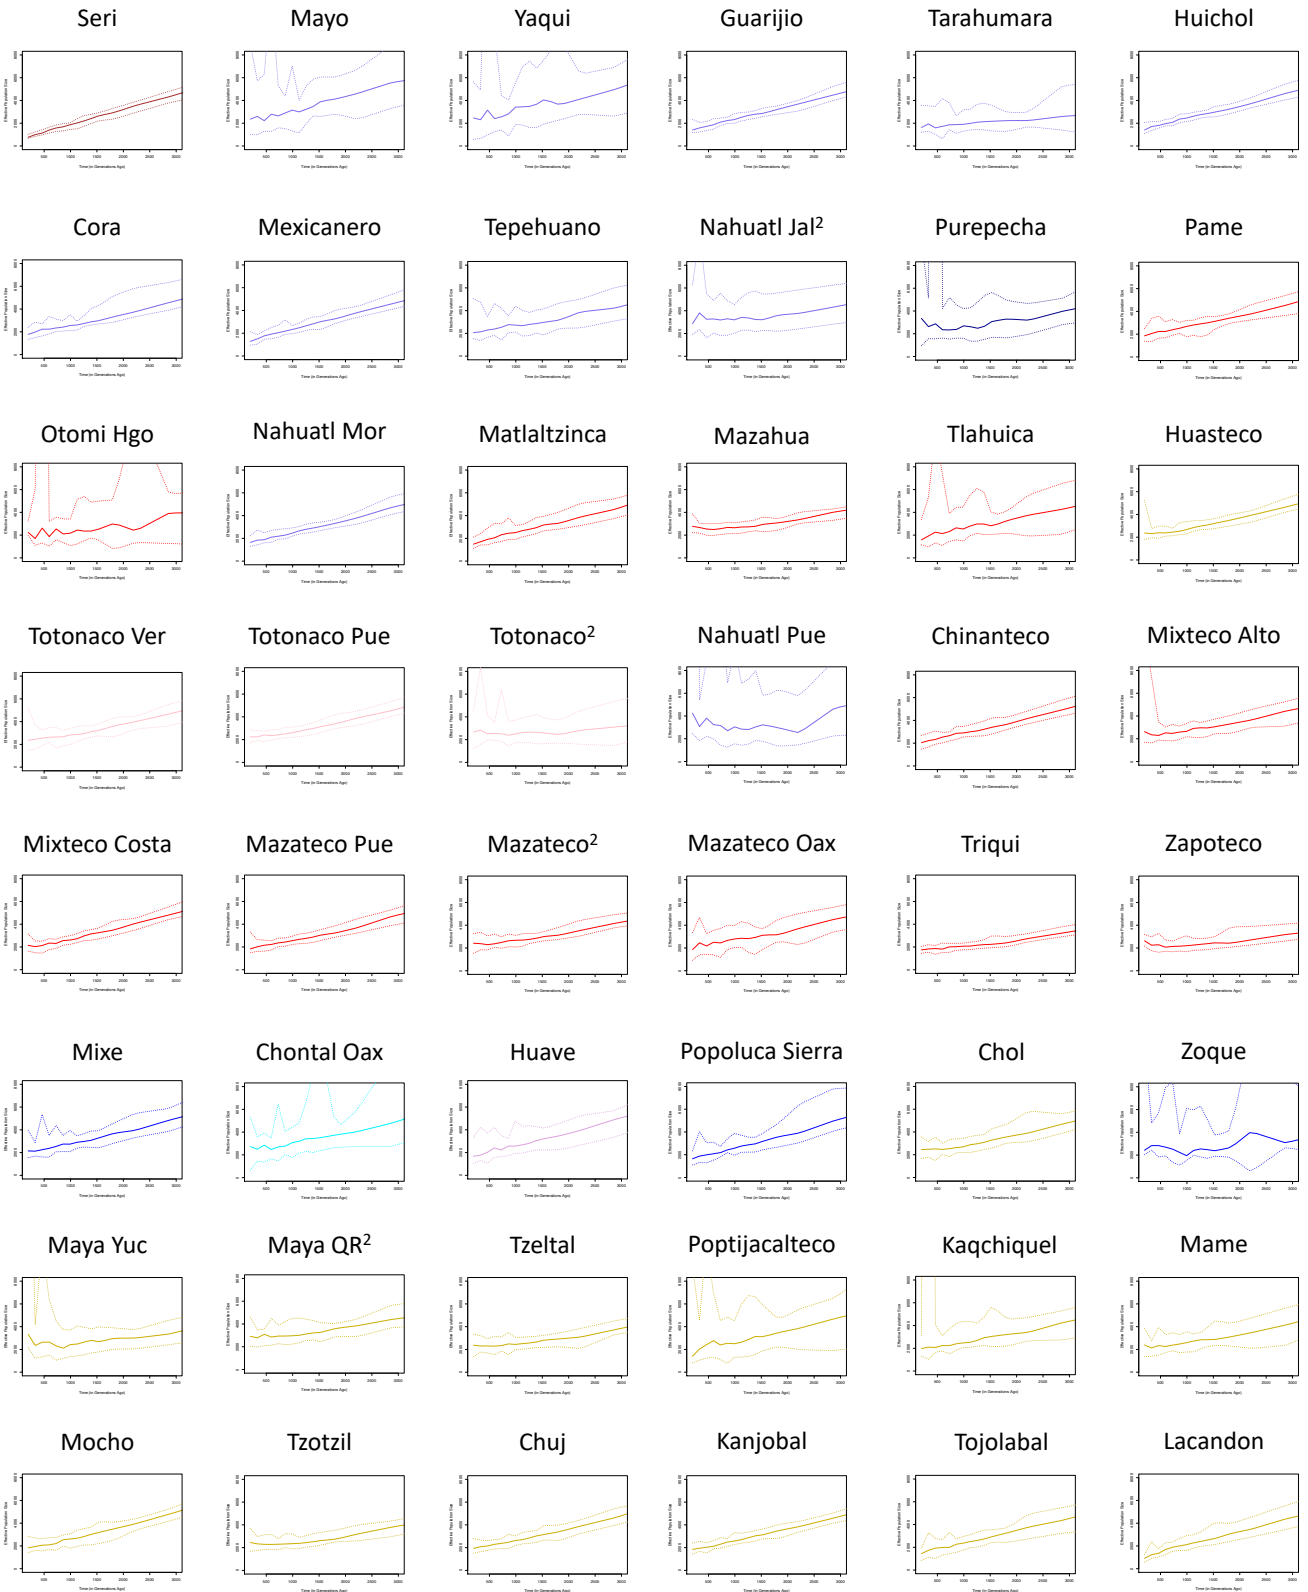

**Supplementary Figure 7. Effective population size across time estimated from linkage disequilibrium in each tested population. Solid lines represent the effective population size and dashed lines represent the 95% confidence interval.**

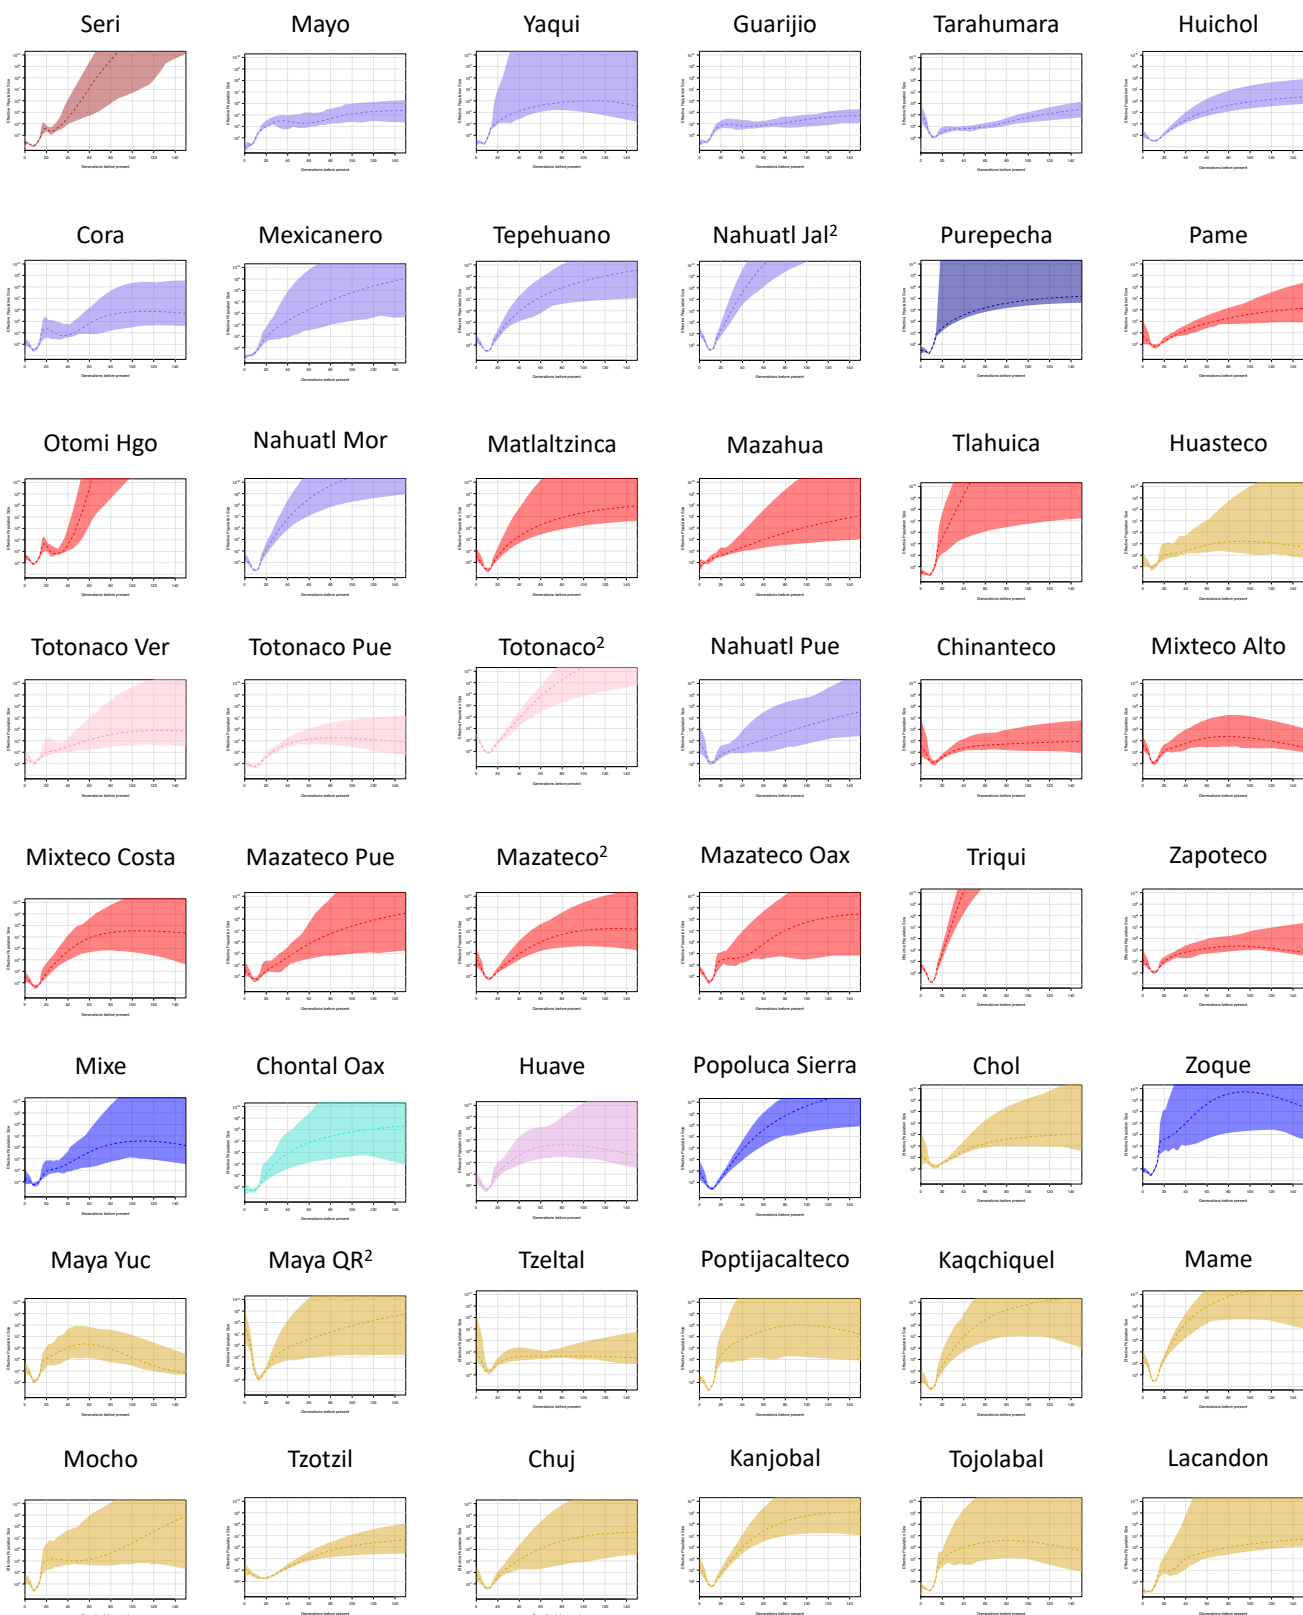

**Supplementary Figure 8. Reconstruction of  $N_e$  across time based on IBD segments.** In each one of the 48 populations examined here, there are evidence of a bottleneck spanning 15-30 generations ago. Dashed lines represent the effective populations size, colored regions represent the 95% confidence intervals.

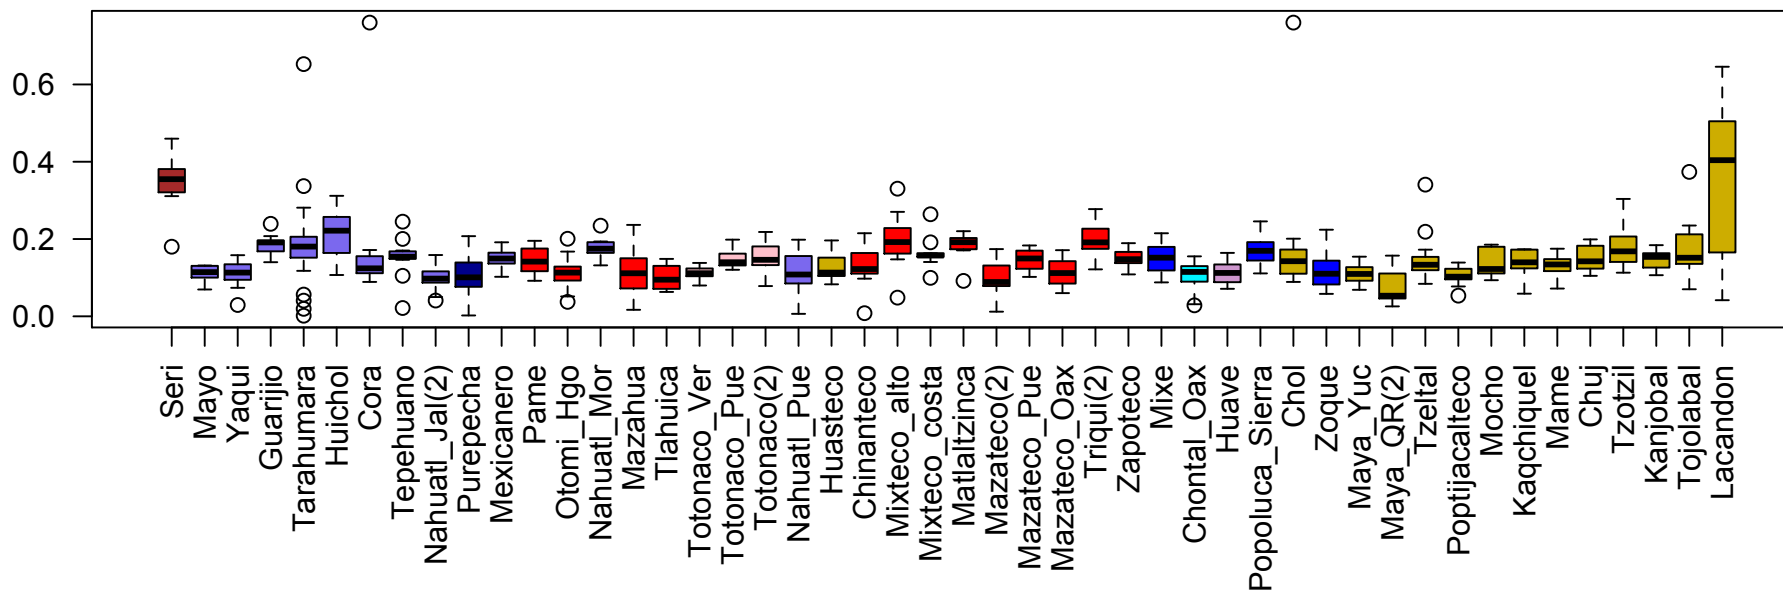

**Supplementary Figure 9. Proportion of the genome in ROH in Indigenous groups of Mexico.** We are showing the ROH proportion for 48 selected populations (see supplementary table 3). Boxplots shows the median (middle line), the first and third quartiles (lower and upper hinges) non-outlier range (whiskers) and individual points are the outliers.

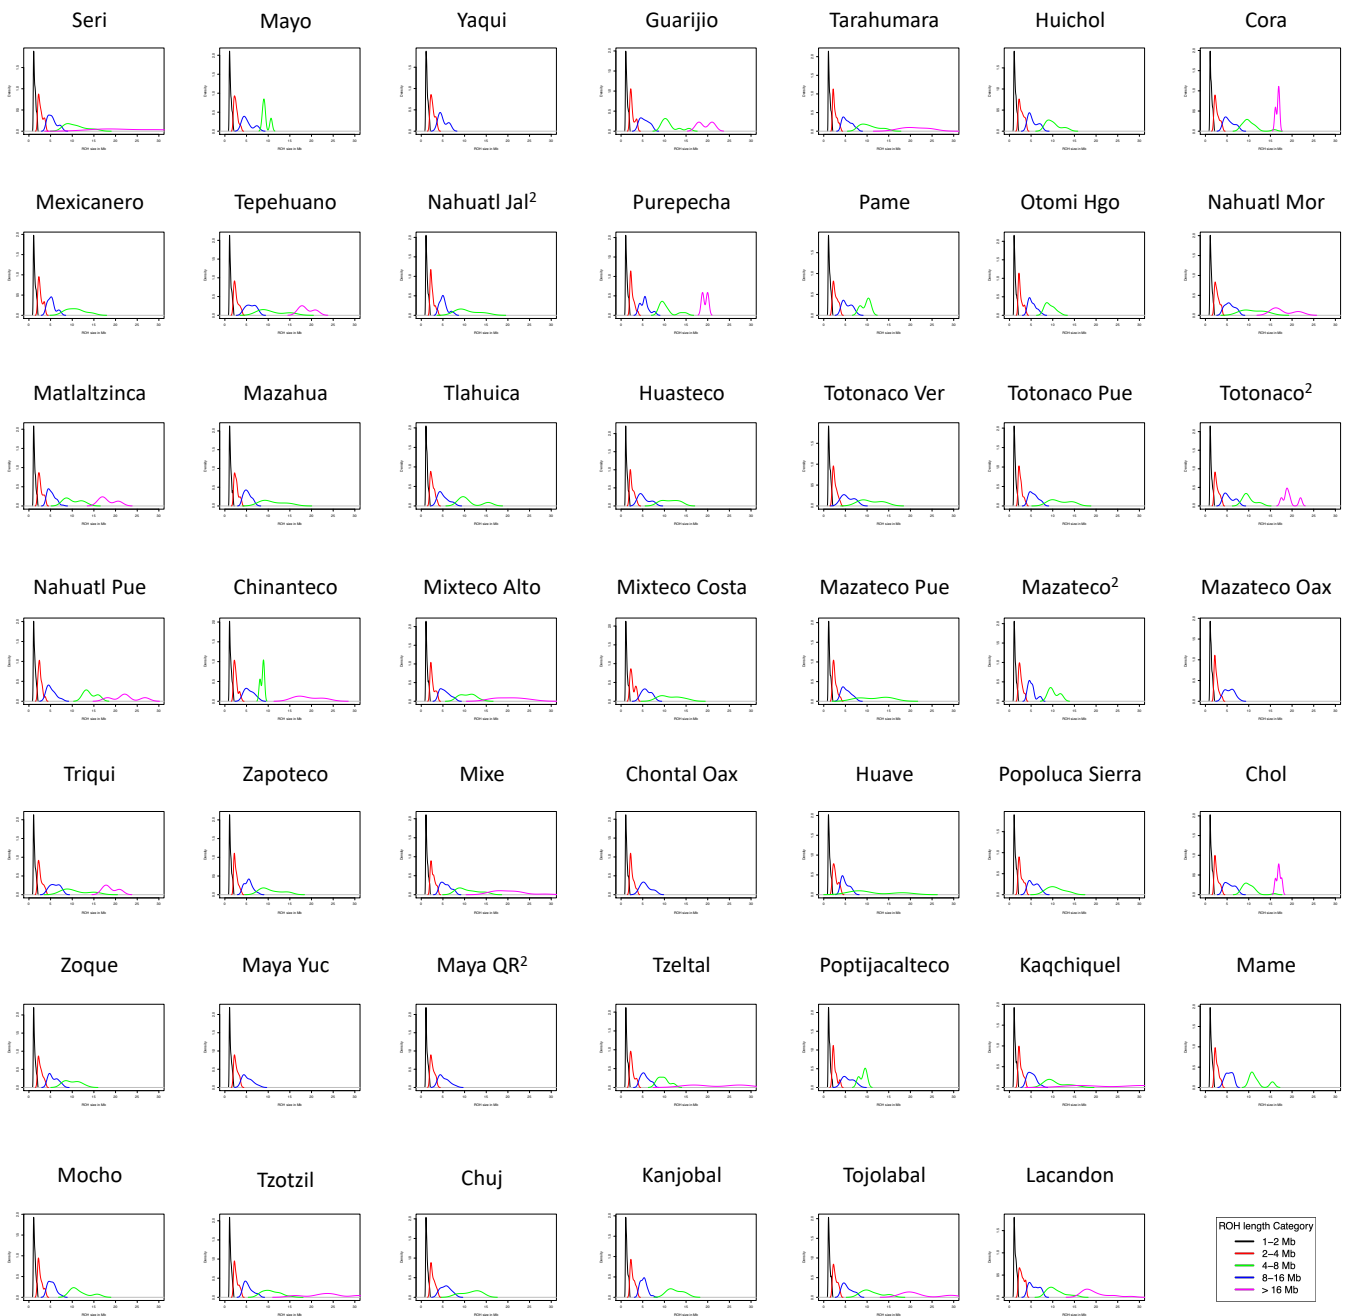

**Supplementary Figure 10. Distribution of ROH in each population. Kernel distribution of ROH by length category expressed in Mb.**



**a**

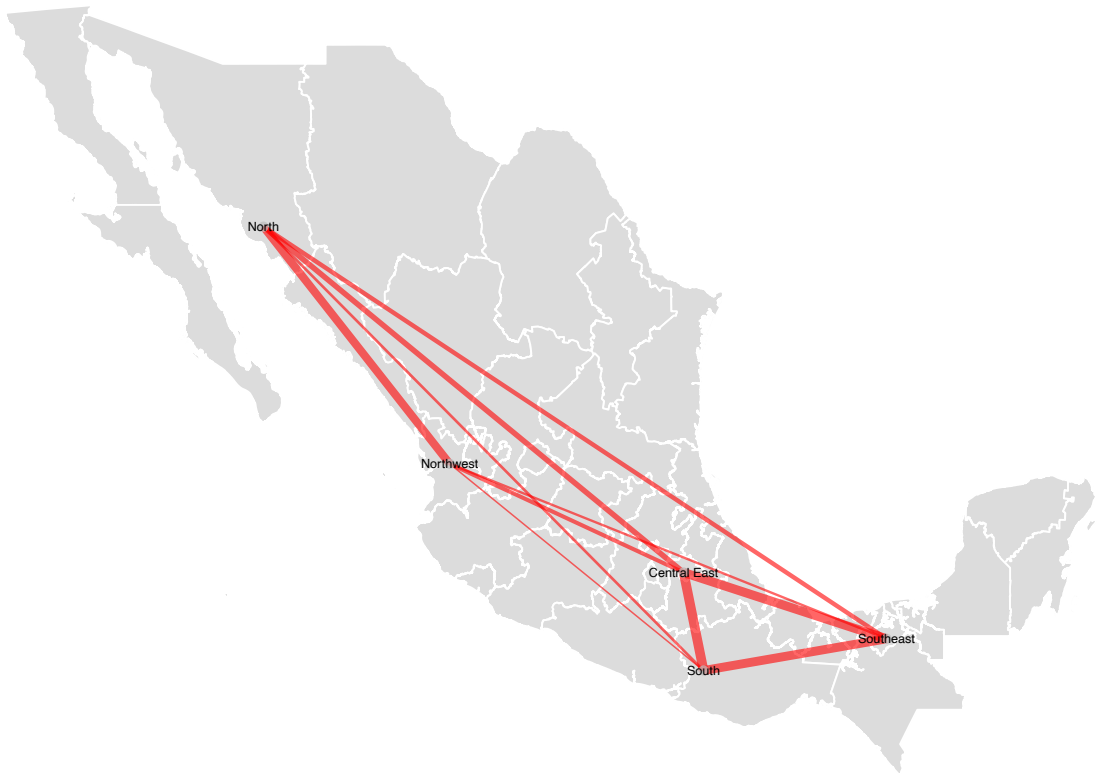

**b**

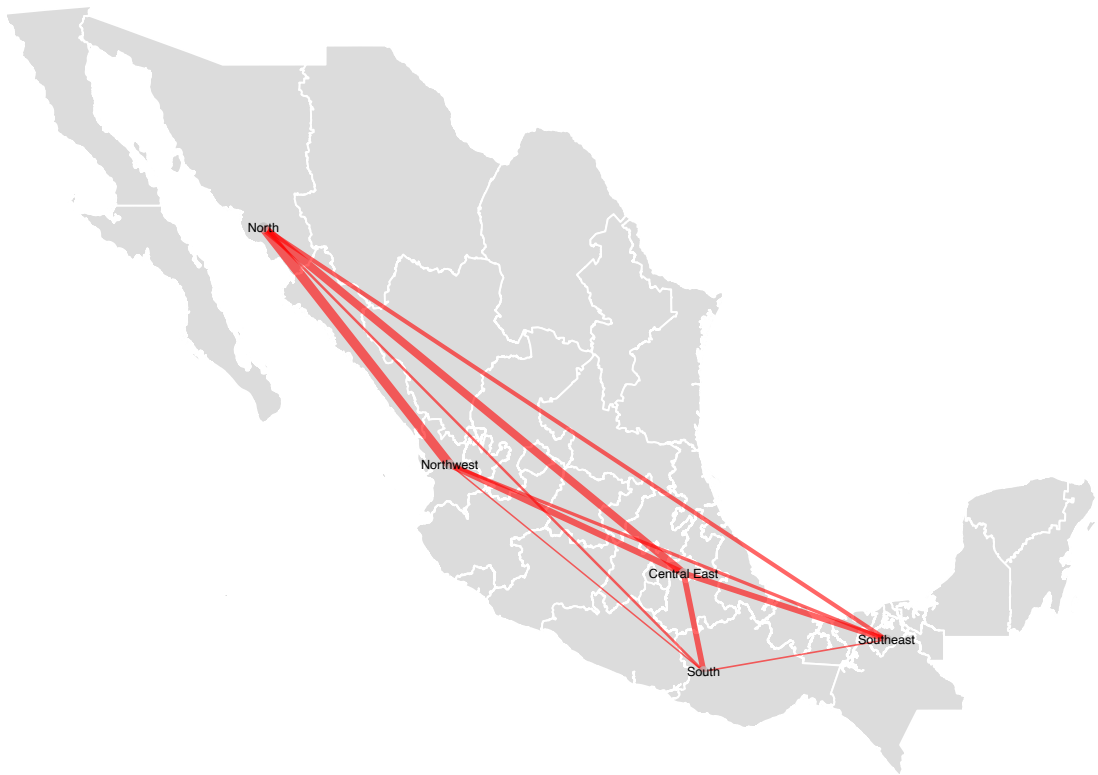

**Supplementary Figure 11. IBD segments analysis performed in Indigenous populations clustered by geographic region. (a) IBD segments ranged from 5 -10 cM (b) IBD segments above 10 cM. The width of each edge is proportional to the mean IBD length. Made with Natural Earth. Free vector and raster map data @ [naturalearthdata.com](http://naturalearthdata.com).**

**a**

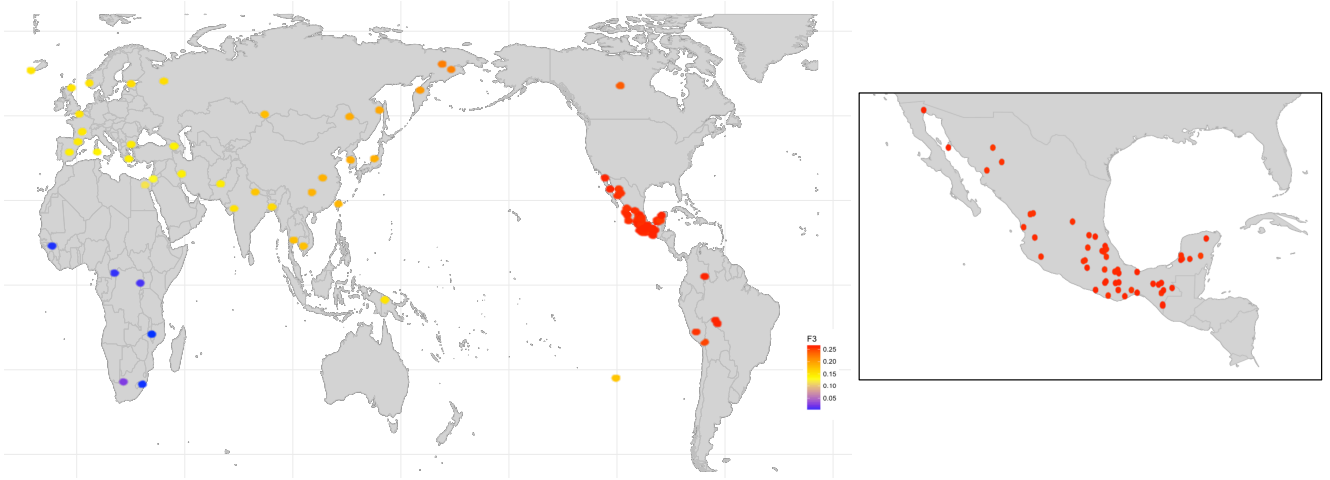

**b**

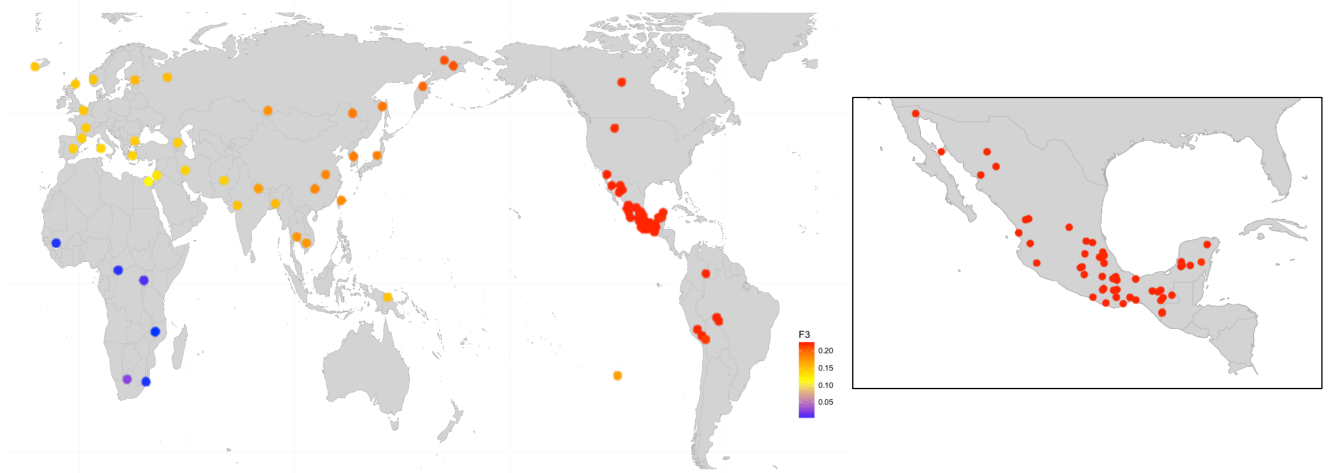

**Supplementary Figure 12. F3 statistics in the form of  $f3(\text{YRI}; \text{Ancient, Mexican Indigenous population})$ .  $f3$  statistic for (a) USA1 and (b) Anzick-1. Yoruba and Han populations were also included in this analysis (Supplementary Data 8). Made with Natural Earth. Free vector and raster map data @ [naturalearthdata.com](http://naturalearthdata.com).**

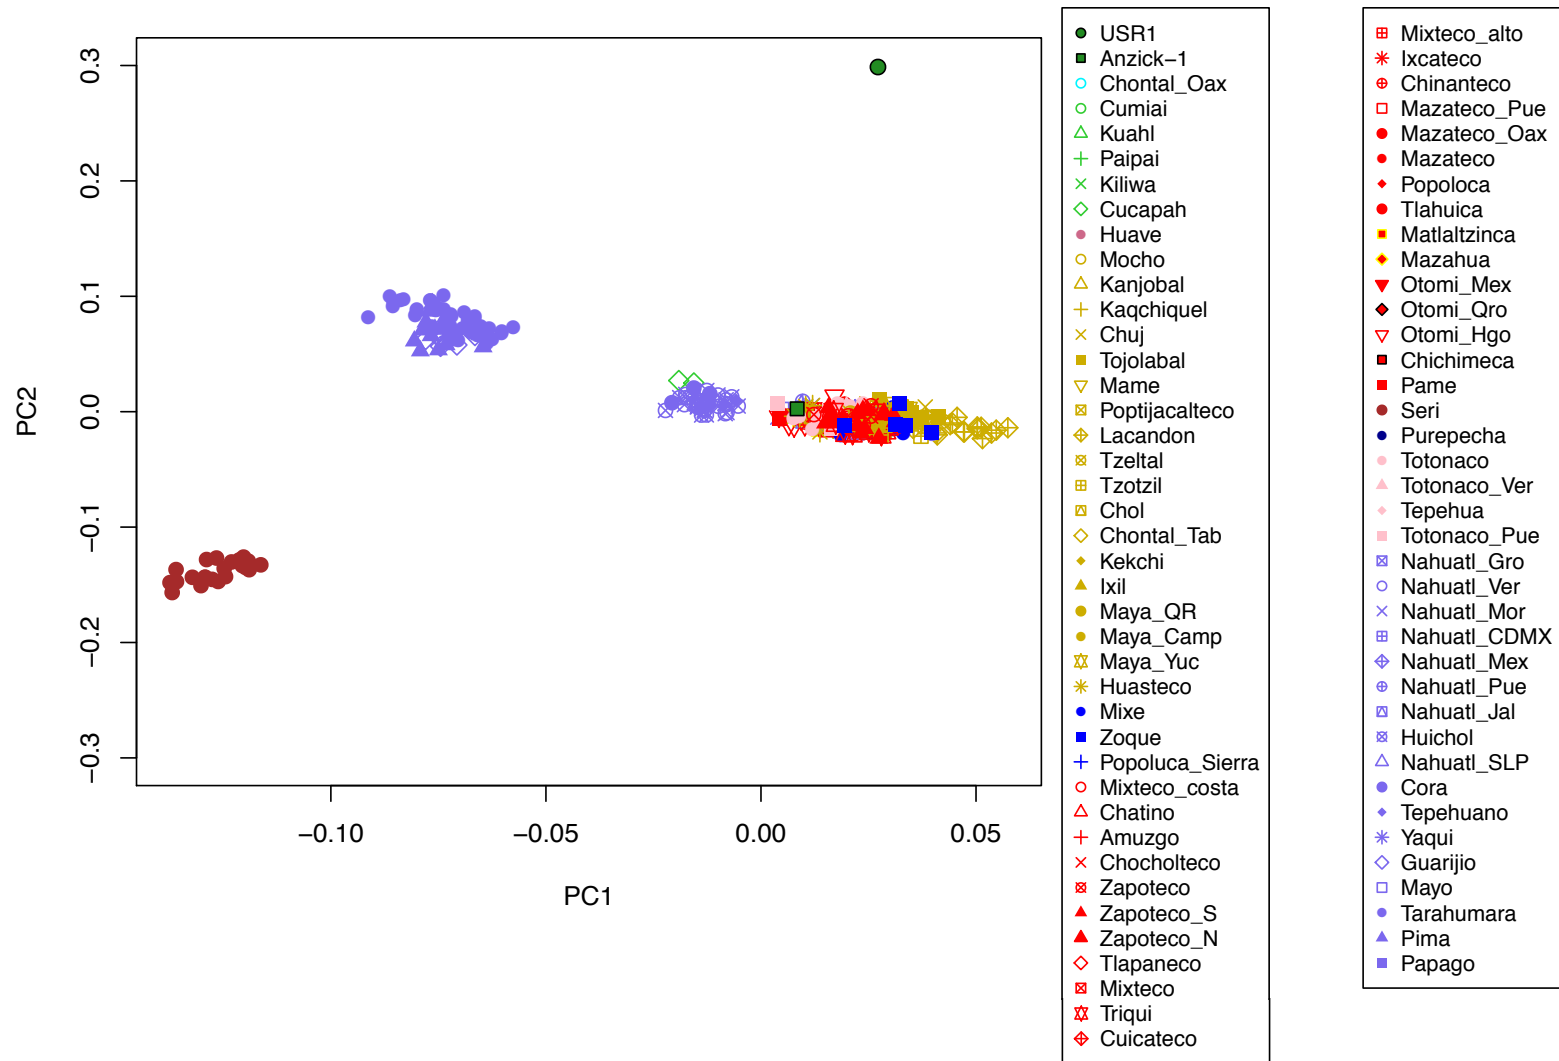

**Supplementary Figure 13. PCA projection of Mexican Indigenous populations including ancient genomes from America.** Top two PC projection shows that USR1 acts as outlier for all Indigenous populations from Mexico and that Mesoamerican populations are more closely related to ancient genome of Anzick-1. Except for USR1 and Anzick-1, colors represent the linguistic family according to figure 1.

**a**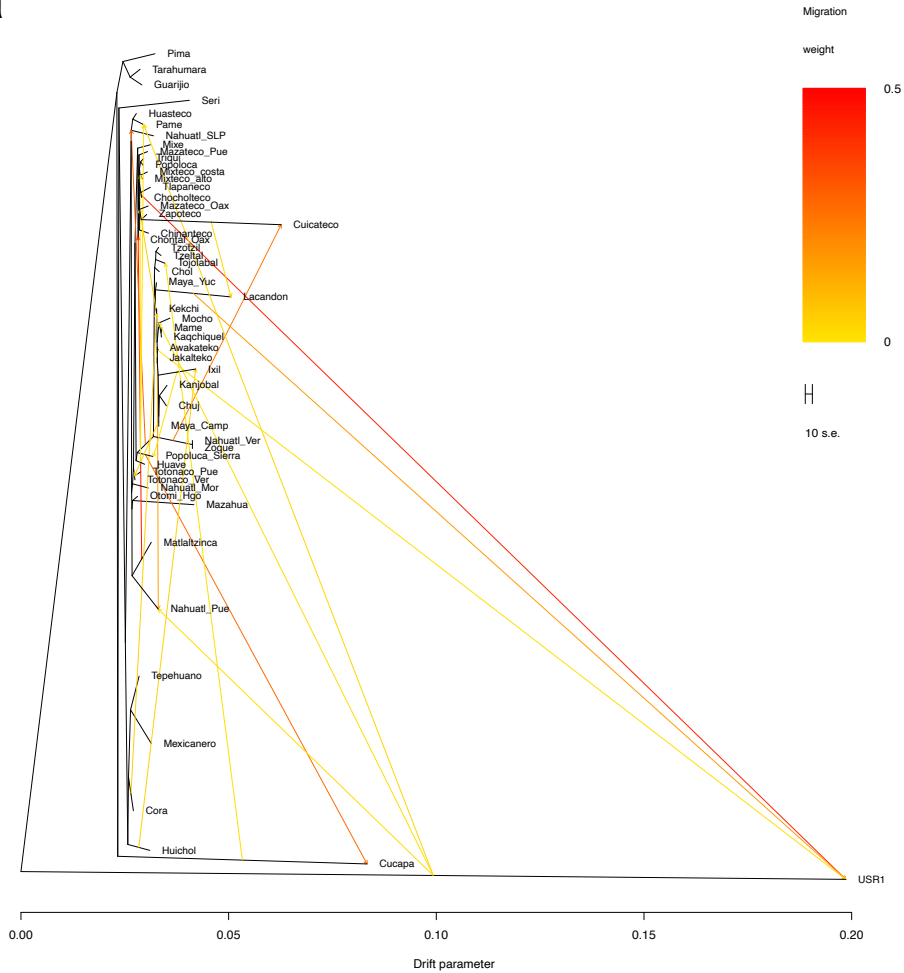**b**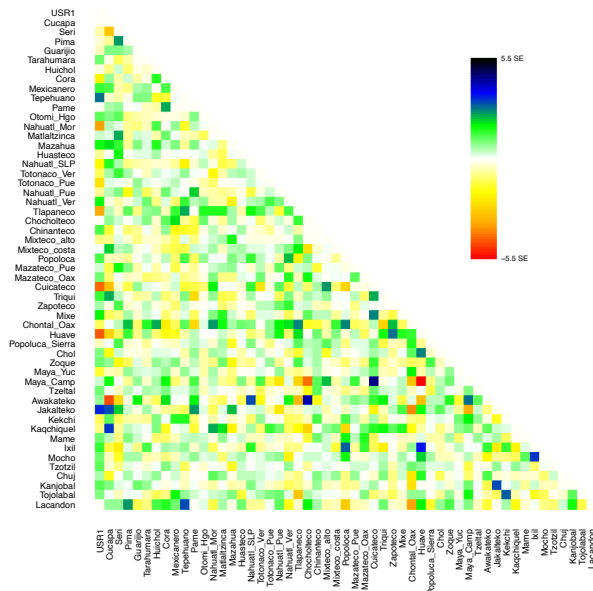

**Supplementary Figure 14. Maximum likelihood Tree assuming 20 migrations performed in Treemix. (a)** Maximum likelihood tree simulating 20 migration events shows a multiple migration waves between populations from Aridoamerica and Mesoamerica. **(b)** Residuals of the likelihood tree.

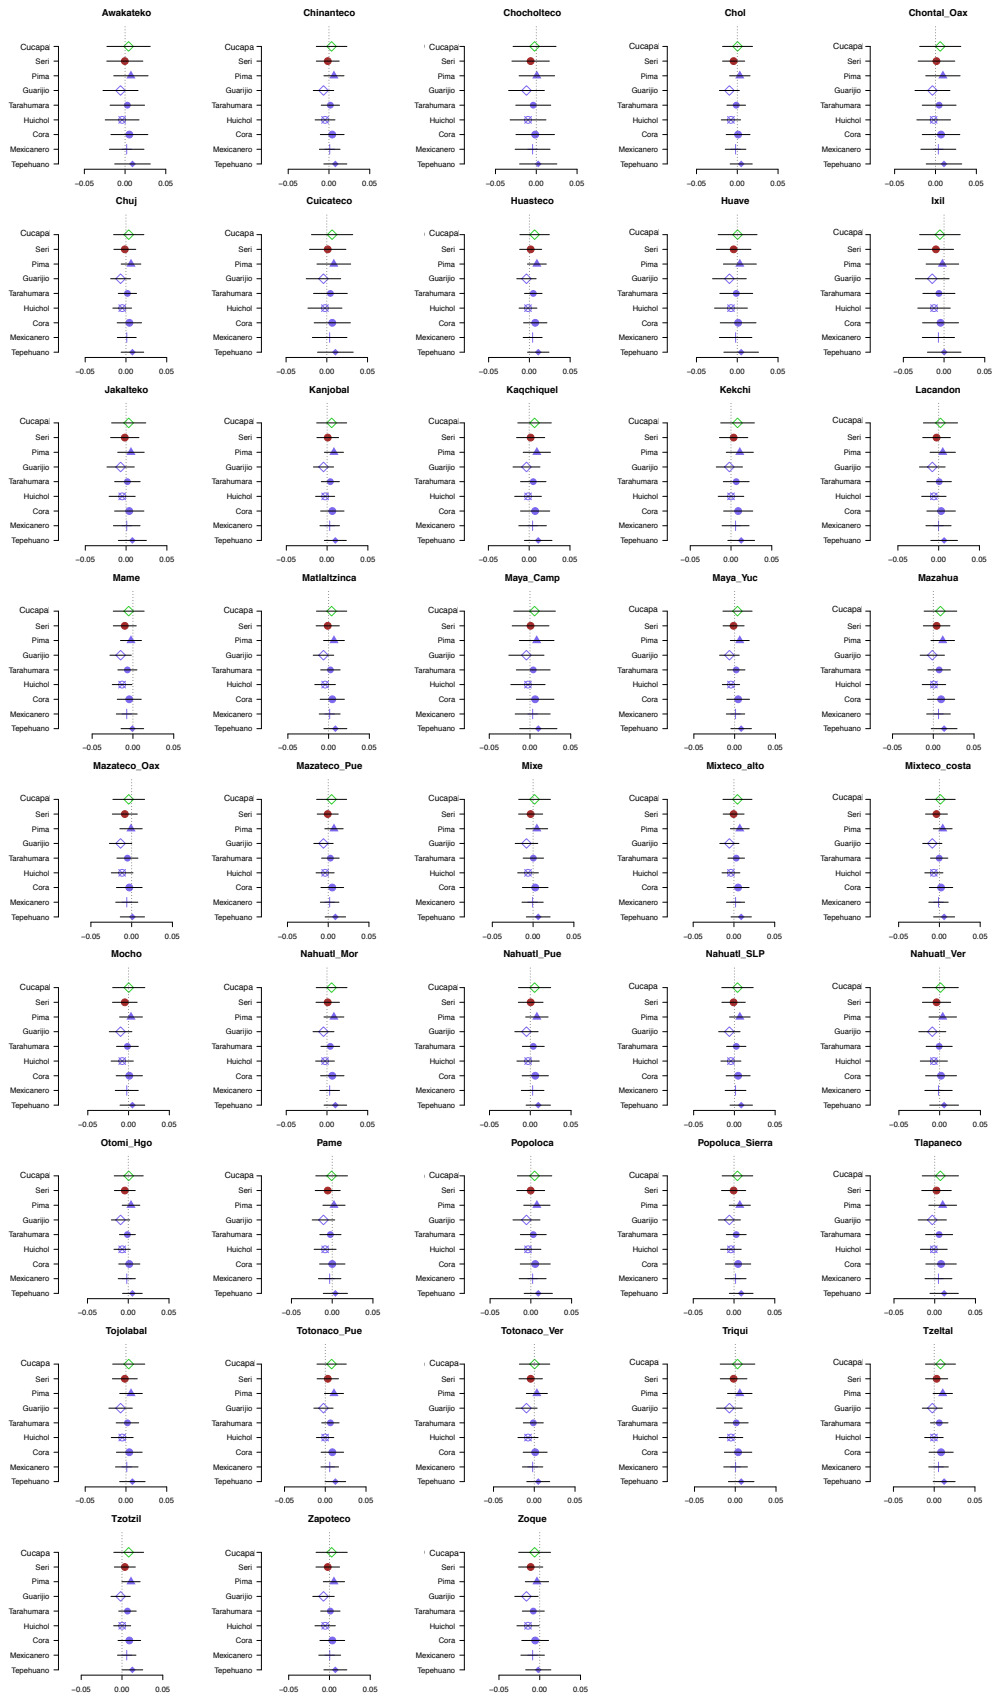

**Supplementary Figure 15. D-statistic in the form of  $D(\text{YRI}, \text{ANCB}/\text{NNA}; \text{AA}, \text{MA})$ . We used the ancient Lucier individual as a representative of ANCB/NNA ancestry. Error bars represents 3 standard errors.**

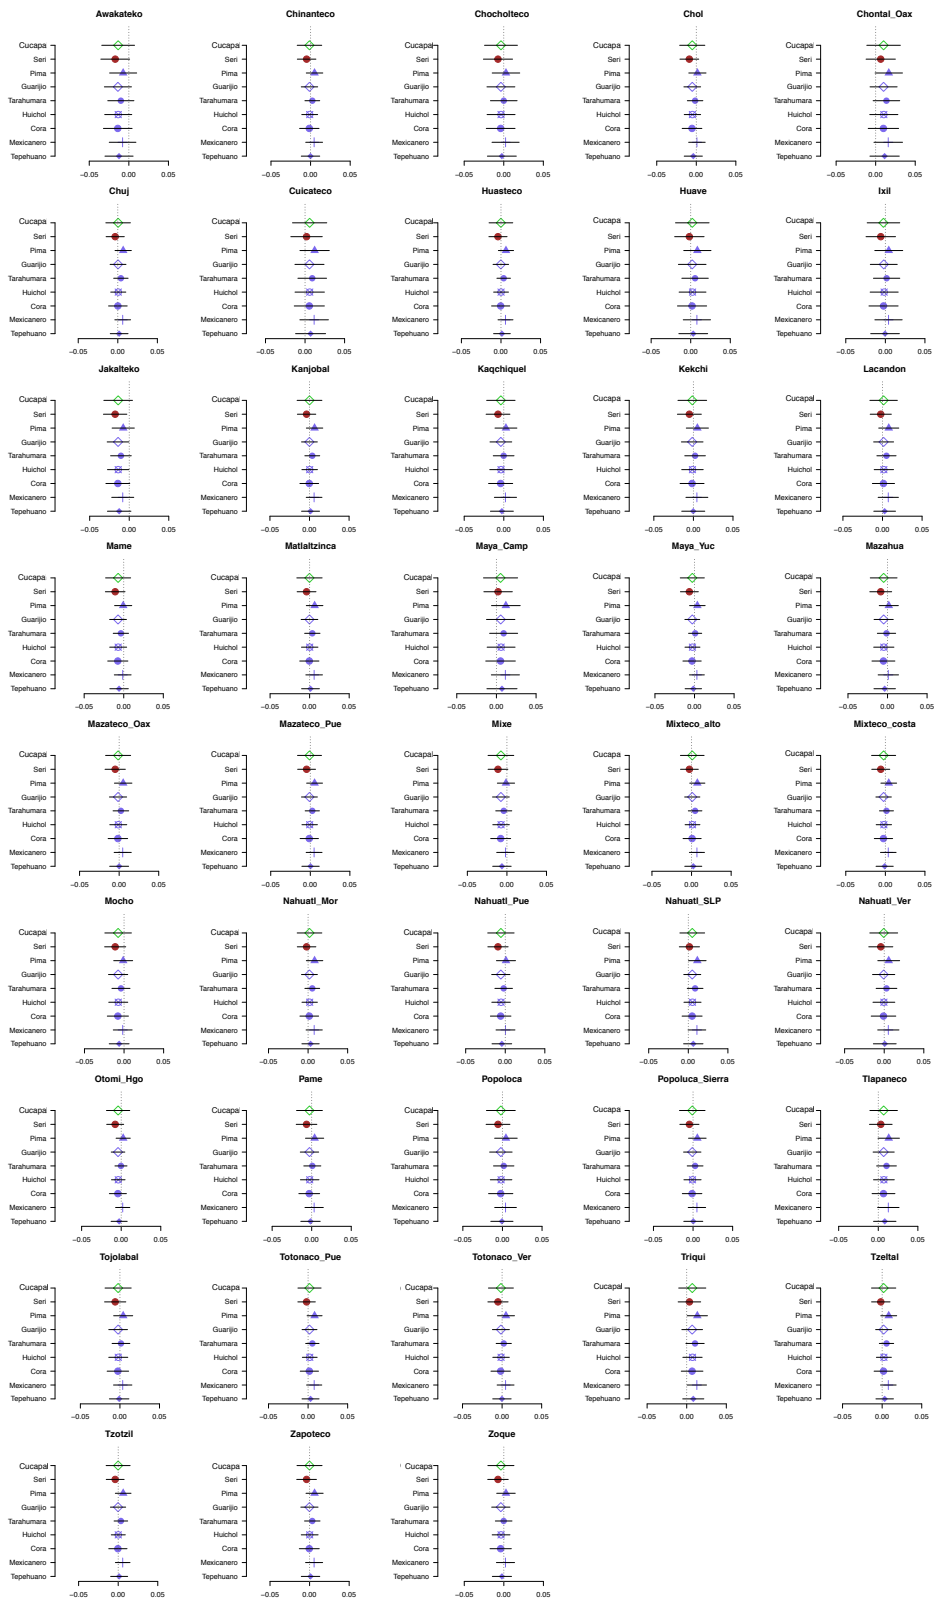

**Supplementary Figure 16. D-statistic in the form of  $D(\text{YRI}, \text{ANCB}/\text{NNA}; \text{AA}, \text{MA})$ . We used the ancient Athabaskan individual as a representative of ANCB/NNA ancestry. Error bars represents 3 standard errors.**

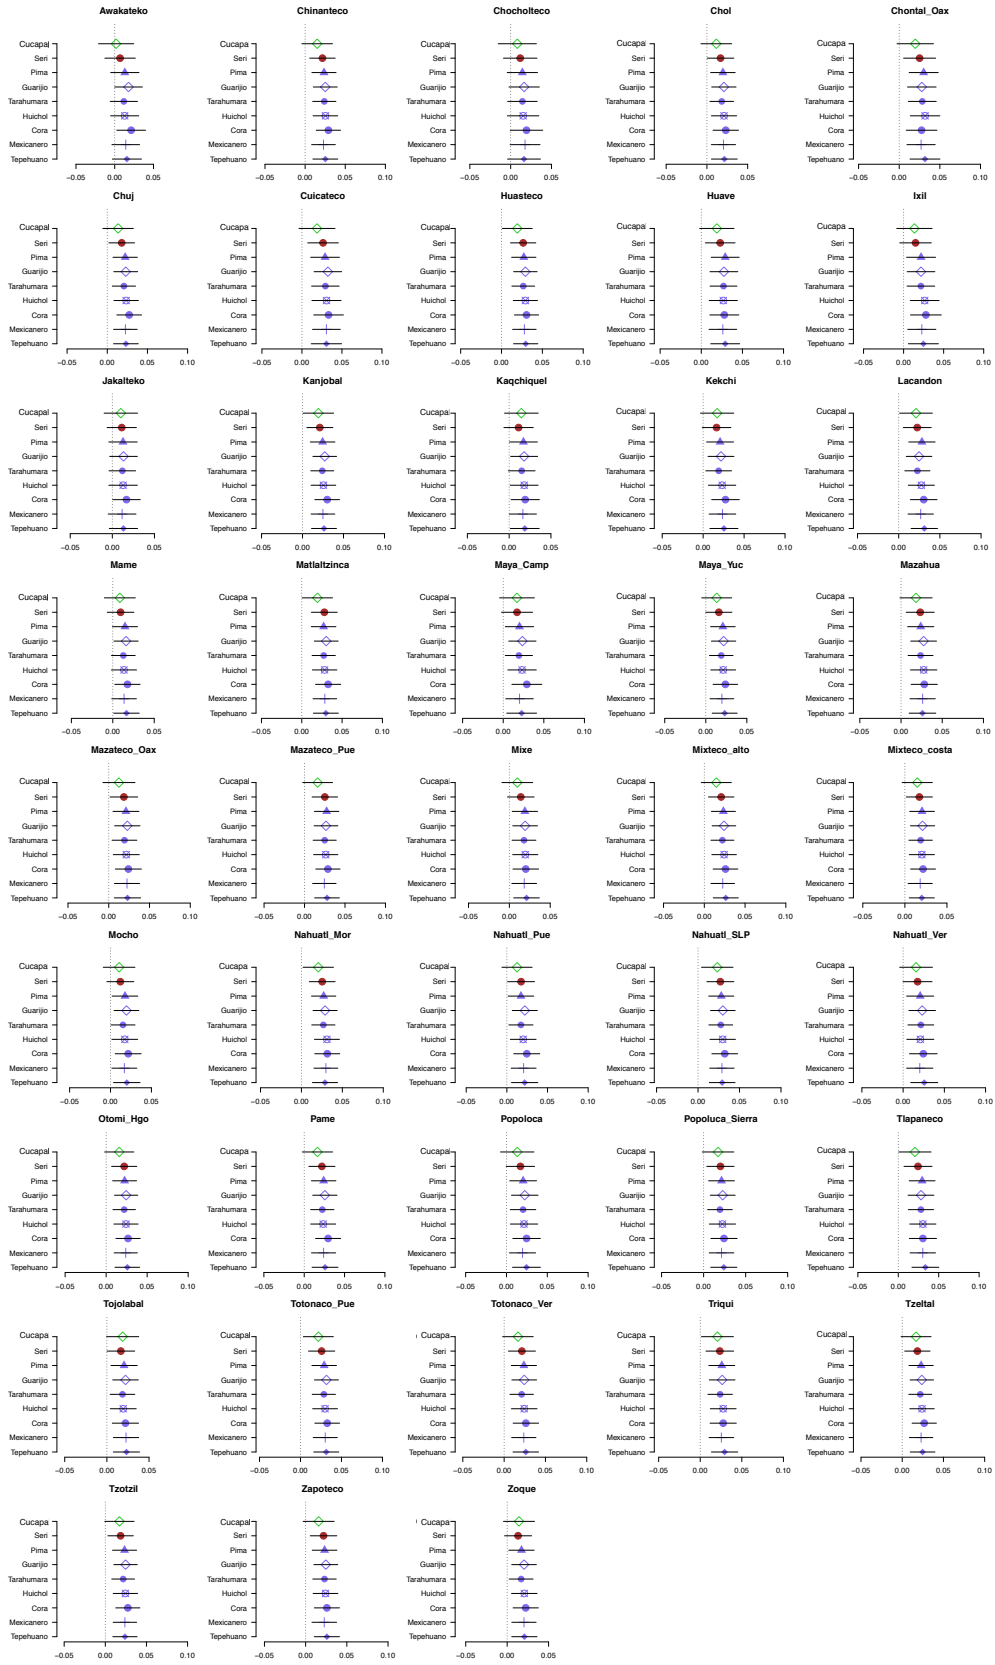

**Supplementary Figure 17. D-statistic in the form of  $D(\text{YRI}, \text{AA}; \text{Anzick-1}, \text{MA})$ . Error bars represent 3 standard errors.**

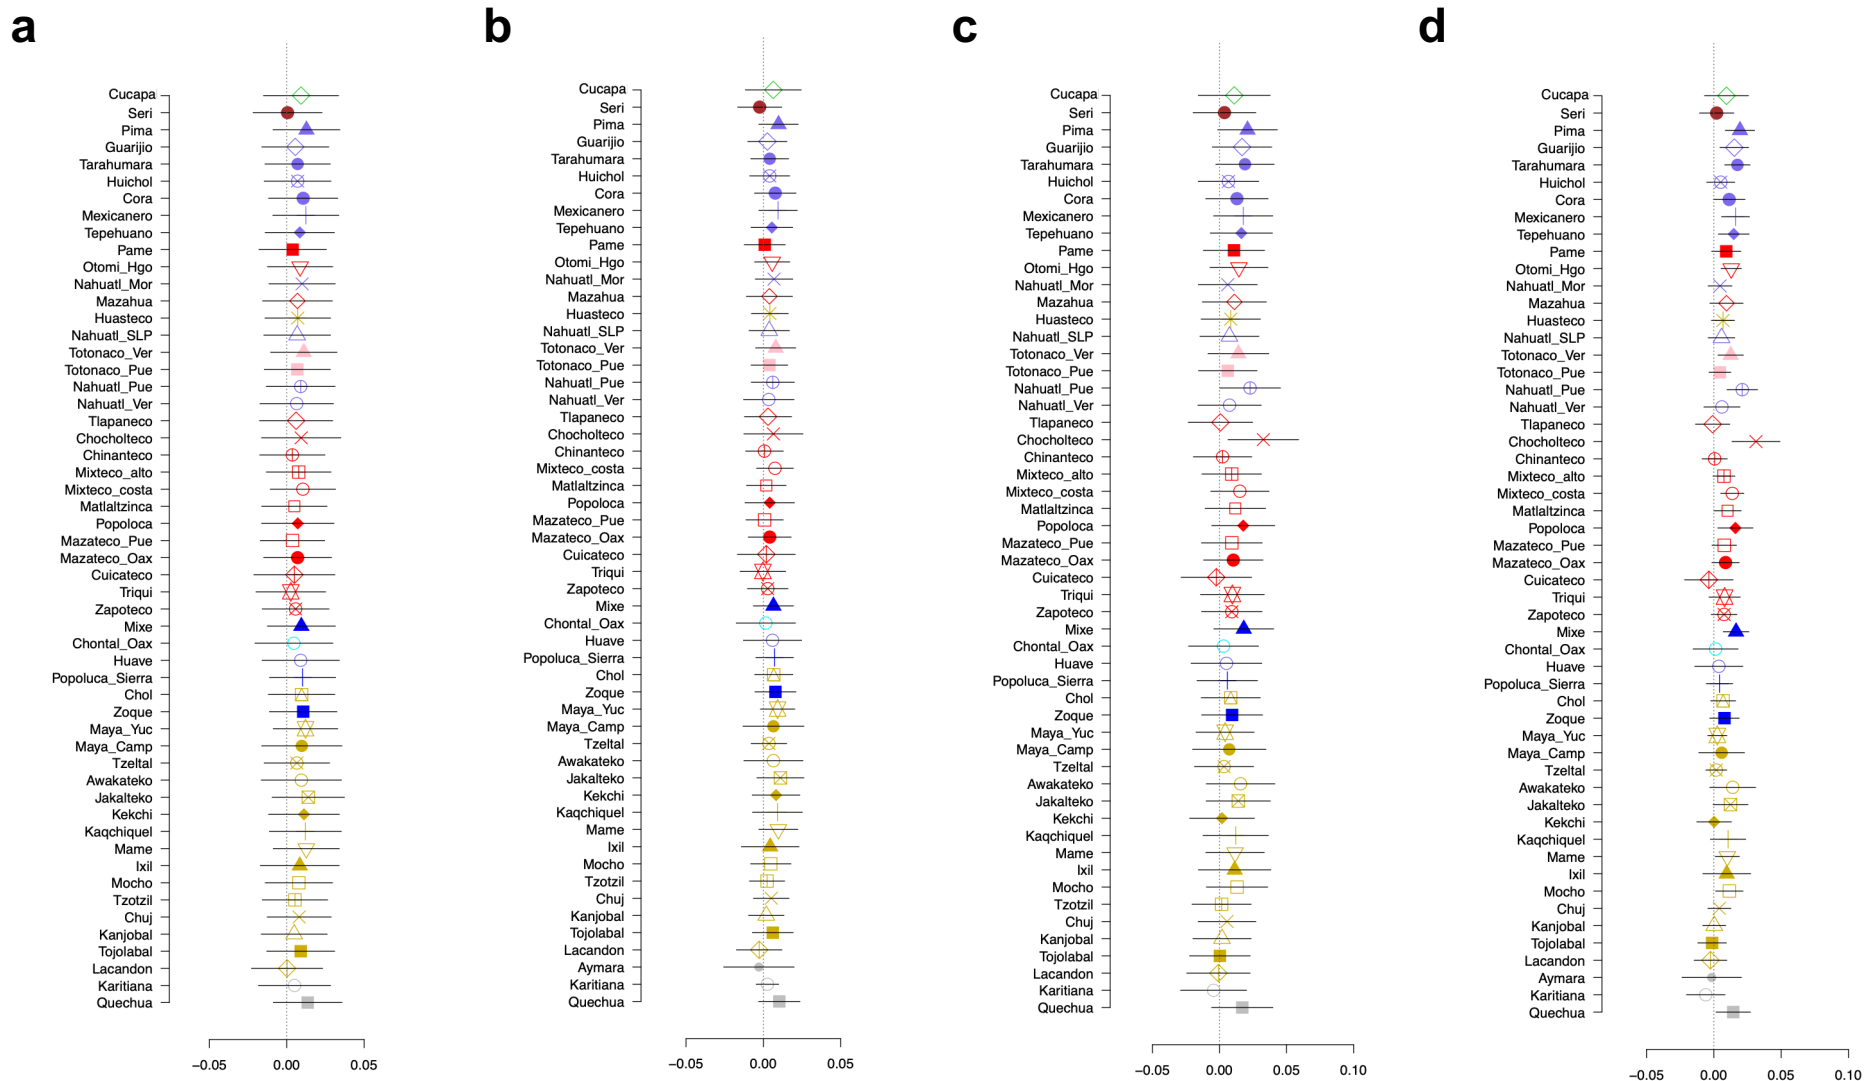

**Supplemental Figure 18. D statistics comparing Mexican indigenous populations with ancient genomes of America. (a)** D in the form of  $D(\text{Yoruba, USR1; Mexican Native population, Aymara})$ . **(b)** D in the form of  $D(\text{Yoruba, USR1; Mexican Native population, Tzotzil})$ . **(c)** D in the form of  $D(\text{Yoruba, Anzick-1; Mexican Native population, Aymara})$ . **(d)** D in the form of  $D(\text{Yoruba, Anzick-1; Mexican Native population, Tzotzil})$ . In **a** to **d**, error bars represent 3 standard errors.
