# Supplementary material for: The genomic landscape of Mexican Indigenous populations brings insights into the peopling of the Americas
Source: PubMed Central journal article supplement (PMC8511047; doi:10.1038/s41467-021-26188-w), 2021-10-12
Supplement: 41467_2021_26188_MOESM3_ESM.pdf [file 41467_2021_26188_MOESM3_ESM.pdf]

Supplementary Data Legends NCOMMS-19-19512C

Supplementary Data 1.  $F_{ST}$  values by pairs of populations.

Supplementary Data 2. Divergence time between pairs of population expressed in  $Ka$ .

Supplementary Data 3. IBD shared segments above 7 cM between Mexican Indigenous populations from the North and the rest of the regions.

Supplementary Data 4. IBD shared segments above 7 cM between Mexican Indigenous populations from the Northwest and the rest of the regions.

Supplementary Data 5. IBD shared segments above 7 cM between Mexican Indigenous populations from the Center and the rest of the regions.

Supplementary Data 6. IBD shared segments above 7 cM between Mexican Indigenous populations from the South and the rest of the regions.

Supplementary Data 7. IBD shared segments above 7 cM between Mexican Indigenous populations from the Southeast and the rest of the regions.

Supplementary Data 8. Output  $f_3$  statistics in the form of  $f_3(\text{ancient genome, tested population; Yoruba})$ .
